# Supplementary material for: Nasopharyngeal Microbiome of COVID-19 Patients Using 16S Amplicon Analysis Revealed Distinct Bacterial Profile in Demised and Recovered Individuals
Source: Research Square preprint supplement (doi:10.21203/rs.3.rs-966672/v1), 2021-10-20
Supplement: Supplementary file 1 [file 0552e65c4a7bf8ae37976c7b.xlsx]

## Sheet: Table S1
Table S1: Metadata for all the samples included in this study. Meril COVID-19 One-step RT-PCR Kit, Meril Diagnostics (India) target ORF 1ab and the nucleoprotein N gene, QUANTIPLUS KIT, Huwel Lifesciences (India) targets E and N gene, and DiAGSure nCoV-19 Assay, GCC Biotech (India) kit target ORF 1ab and E gene of SARS-CoV-2. VIRALDTECT - II Multiplex Real Time PCR Kit for COVID-19 target E, N an…
Sr. No	Lab ID	Group/PatientStatus	Virus-name	GISAID ACCESSION	Lineage	Hospital Name	Age	Gender	Date of Sample Collection	Symptoms Status	Symptoms	Comorbidity	Testing Kit Used	ORF-1ab	N-Gene	E-Gene	RDRP
1	NCD108	Demise	hCoV-19/India/GJ-GBRC527/2020	EPI_ISL_1677752	B.1.36	GMERS Medical College and Hospital, Gotri, Vadodara	66	Male	2020-12-12	Symptomatic	Cough & Lung Infection	NA	Meril COVID-19 One-step RT-PCR Kit, Meril Diagnostics (India)	18.46	19.85	NA	NA
2	NCD109	Demise	hCoV-19/India/GJ-GBRC528/2020	EPI_ISL_1706593	B.1.36.8	GMERS Medical College and Hospital, Gotri, Vadodara	36	Male	2020-12-12	Symptomatic	Fever	Heart Disease	Meril COVID-19 One-step RT-PCR Kit, Meril Diagnostics (India)	19	20.59	NA	NA
3	NCD112	Demise	hCoV-19/India/GJ-GBRC531a/2020	EPI_ISL_4237846	B.1.1.216	GMERS Medical College and Hospital, Gotri, Vadodara	78	Male	2020-12-13	Symptomatic	NA	NA	Meril COVID-19 One-step RT-PCR Kit, Meril Diagnostics (India)	22.07	22.46	NA	NA
4	NCD115	Demise	hCoV-19/India/GJ-GBRC534/2020	EPI_ISL_1706594	B.1.36	GMERS Medical College and Hospital, Gotri, Vadodara	88	Male	2020-12-15	Symptomatic	Cough	Asthma & alzimer	Meril COVID-19 One-step RT-PCR Kit, Meril Diagnostics (India)	17.42	18.58	NA	NA
5	NCD119	Demise	hCoV-19/India/GJ-GBRC537a/2020	EPI_ISL_1677764	B.1.1.216	GMERS Medical College and Hospital, Gotri, Vadodara	53	Female	2020-12-23	Symptomatic	Cough	NA	Meril COVID-19 One-step RT-PCR Kit, Meril Diagnostics (India)	16.62	20.02	NA	NA
6	NCD127	Demise	hCoV-19/India/GJ-GBRC547/2021	EPI_ISL_1677778	B.1.36.8	GMERS Medical College and Civil Hospital, Sola, Ahmedabad	81	Male	2021-01-02	Symptomatic	Breatlessness	NA	VIRALDTECT - II Multiplex Real Time PCR Kit for COVID-19	NA	20	20	20
7	NCD145	Demise	hCoV-19/India/GJ-GBRC581a/2020	EPI_ISL_2001149	B.1.36	Goverment Medical College, Bhavnagar	75	Male	2020-12-19	Symptomatic	Cough	Heart Disease	Meril COVID-19 One-step RT-PCR Kit, Meril Diagnostics (India)	21	25	NA	NA
8	NCD192	Demise	hCoV-19/India/GJ-GBRC590/2021	EPI_ISL_2001165	B.1.1.7	PanGenomics International Pvt. Ltd., Ahmedabad	86	Male	2021-02-06	Symptomatic	Running nose,diarrhoea,weakness,	Hypertension,kidney disfunction	TRUPCR® COVID-19 Real-Time RT-PCR Kit	NA	24	NA	NA
9	NCD278	Recovered	hCoV-19/India/GJ-GBRC575a/2021	EPI_ISL_2001139	B.1.617.2	GMERS Medical College and Civil Hospital, Gandhinagar	60	Male	2021-03-22	Symptomatic	Fever,breathlessnes,fever (tested positive after getting first dose of vaccine)	Asthma	QUANTIPLUS KIT, Huwel Lifesciences (India)	NA	NA	NA	NA
10	NCD280	Recovered	hCoV-19/India/GJ-GBRC577a/2021	EPI_ISL_2001143	B.1.617.2	GMERS Medical College and Civil Hospital, Gandhinagar	43	Male	2021-03-22	NA	NA	NA	QUANTIPLUS KIT, Huwel Lifesciences (India)	NA	NA	NA	NA
11	NCD371	Recovered	hCoV-19/India/GJ-GBRC641/2021	EPI_ISL_2017728	B.1.617.2	Goverment Medical College, Surat	21	Male	2021-03-28	Symptomatic	Headach & fever	NA	QUANTIPLUS KIT, Huwel Lifesciences (India)	NA	13	16	NA
12	NCD373	Recovered	hCoV-19/India/GJ-GBRC643/2021	EPI_ISL_2017731	B.1.617.2	Goverment Medical College, Surat	30	Male	2021-03-28	Symptomatic	Loss of smell,fever	NA	QUANTIPLUS KIT, Huwel Lifesciences (India)	NA	15	15	NA
13	NCD375	Recovered	hCoV-19/India/GJ-GBRC645a/2021	EPI_ISL_2017734	B.1.617.2	Goverment Medical College, Surat	22	Female	2021-03-29	Symptomatic	Sore throat,Cough,running nose,fever	NA	QUANTIPLUS KIT, Huwel Lifesciences (India)	NA	16	16	NA
14	NCD396	Demise	hCoV-19/India/GJ-GBRC658a/2021	EPI_ISL_2017757	B.1.617.2	GMERS Medical College and Hospital, Gotri, Vadodara	76	Male	2021-04-07	Asymptomatic	NA	NA	QUANTIPLUS KIT, Huwel Lifesciences (India)	NA	22	22	NA
15	NCD398	Recovered	hCoV-19/India/GJ-GBRC660a/2021	EPI_ISL_2017761	B.1.617.2	Smt. NHL Municipal Medical College, Ahmedabad	36	Male	2021-04-14	Symptomatic	Fever,Bodyach,weakness,loss of taste & smell,cough	NA	QUANTIPLUS KIT, Huwel Lifesciences (India)	NA	24	22	NA
16	NCD399	Recovered	hCoV-19/India/GJ-GBRC722/2021	EPI_ISL_2405118	B.1.617.2	Smt. NHL Municipal Medical College, Ahmedabad	71	Female	2021-04-14	NA	Fever and body ache	NA	QUANTIPLUS KIT, Huwel Lifesciences (India)	NA	22	20	NA
17	NCD401	Recovered	hCoV-19/India/GJ-GBRC703/2021	EPI_ISL_2391478	B.1.617.2	Smt. NHL Municipal Medical College, Ahmedabad	28	Male	2021-06-12	NA	NA	NA	QUANTIPLUS KIT, Huwel Lifesciences (India)	NA	23	21	NA
18	NCD403	Recovered	hCoV-19/India/GJ-GBRC748/2021	EPI_ISL_2509934	B.1.617.2	Smt. NHL Municipal Medical College, Ahmedabad	46	Male	2021-04-10	Symptomatic	Fever, cough, bodyache	NA	QUANTIPLUS KIT, Huwel Lifesciences (India)	NA	23	24	NA
19	NCD405	Recovered	hCoV-19/India/GJ-GBRC705a/2021	EPI_ISL_2391481	B.1.617.2	Smt. NHL Municipal Medical College, Ahmedabad	55	Female	2021-04-10	NA	NA	NA	QUANTIPLUS KIT, Huwel Lifesciences (India)	NA	23	24	NA
20	NCD406	Recovered	hCoV-19/India/GJ-GBRC706a/2021	EPI_ISL_2391483	B.1.617.2	Smt. NHL Municipal Medical College, Ahmedabad	47	Male	2021-04-10	NA	NA	NA	QUANTIPLUS KIT, Huwel Lifesciences (India)	NA	25	25	NA
21	NCD408	Recovered	hCoV-19/India/GJ-GBRC708a/2021	EPI_ISL_2391486	B.1.617.2	Smt. NHL Municipal Medical College, Ahmedabad	41	Female	2021-04-07	NA	NA	NA	QUANTIPLUS KIT, Huwel Lifesciences (India)	NA	25	24	NA
22	NCD412	Demise	hCoV-19/India/GJ-GBRC727/2021	EPI_ISL_2405123	B.1.617.2	Smt. NHL Municipal Medical College, Ahmedabad	60	Male	2021-04-06	NA	Fever	NA	QUANTIPLUS KIT, Huwel Lifesciences (India)	NA	23	22	NA
23	NCD414	Recovered	hCoV-19/India/GJ-GBRC749/2021	EPI_ISL_2509935	B.1.617.2	Smt. NHL Municipal Medical College, Ahmedabad	24	Male	2021-04-06	Symptomatic	Fever, bodyache	NA	QUANTIPLUS KIT, Huwel Lifesciences (India)	NA	22	21	NA
24	NCD415	Recovered	hCoV-19/India/GJ-GBRC750/2021	EPI_ISL_2509936	B.1.617.2	Smt. NHL Municipal Medical College, Ahmedabad	35	Female	2021-04-06	Symptomatic	Fever, cough, bodyache	NA	QUANTIPLUS KIT, Huwel Lifesciences (India)	NA	23	23	NA
25	NCD416	Recovered	hCoV-19/India/GJ-GBRC751/2021	EPI_ISL_2509937	B.1.617.2	Smt. NHL Municipal Medical College, Ahmedabad	23	Male	2021-04-07	Symptomatic	Cough	NA	QUANTIPLUS KIT, Huwel Lifesciences (India)	NA	20	20	NA
26	NCD491	Demise	hCoV-19/India/GJ-GBRC662/2021	EPI_ISL_2017765	B.1.617.2	BJ Medical College and Civil Hospital, Ahmedabad	48	Female	2021-04-19	NA	NA	NA	QUANTIPLUS KIT, Huwel Lifesciences (India)	NA	28	26	NA
27	NCD494	Demise	hCoV-19/India/GJ-GBRC663/2021	EPI_ISL_2017766	B.1.617.2	BJ Medical College and Civil Hospital, Ahmedabad	65	Male	2021-04-20	NA	NA	Diabetes	QUANTIPLUS KIT, Huwel Lifesciences (India)	NA	28	28	NA
28	NCD497	Demise	hCoV-19/India/GJ-GBRC664/2021	EPI_ISL_2017767	B.1.617.2	BJ Medical College and Civil Hospital, Ahmedabad	61	Male	2021-04-19	Symptomatic	Breathlessness, Fever, Cough	NA	QUANTIPLUS KIT, Huwel Lifesciences (India)	NA	28	26	NA
29	NCD499	Demise	hCoV-19/India/GJ-GBRC665/2021	EPI_ISL_2017768	B.1.617.2	BJ Medical College and Civil Hospital, Ahmedabad	27	Male	2021-04-20	NA	NA	NA	QUANTIPLUS KIT, Huwel Lifesciences (India)	NA	24	22	NA
30	NCD500	Demise	hCoV-19/India/GJ-GBRC666a/2021	EPI_ISL_2017769	B.1.617.2	BJ Medical College and Civil Hospital, Ahmedabad	58	Female	2021-04-20	NA	NA	NA	QUANTIPLUS KIT, Huwel Lifesciences (India)	NA	26	24	NA
31	NCD501	Demise	hCoV-19/India/GJ-GBRC667/2021	EPI_ISL_2017771	B.1.617.2	BJ Medical College and Civil Hospital, Ahmedabad	59	Male	2021-04-20	NA	NA	NA	QUANTIPLUS KIT, Huwel Lifesciences (India)	NA	22	20	NA
32	NCD502	Demise	hCoV-19/India/GJ-GBRC668/2021	EPI_ISL_2017772	B.1.617.2	BJ Medical College and Civil Hospital, Ahmedabad	55	Male	2021-04-20	NA	NA	NA	QUANTIPLUS KIT, Huwel Lifesciences (India)	NA	22	20	NA
33	NCD506	Demise	hCoV-19/India/GJ-GBRC670/2021	EPI_ISL_2017774	B.1.617.2	BJ Medical College and Civil Hospital, Ahmedabad	60	Male	2021-04-20	Symptomatic	Fever, Breathlessness	Hypertension, Diabetes, Spinal pain	QUANTIPLUS KIT, Huwel Lifesciences (India)	NA	28	26	NA
34	NCD508	Demise	hCoV-19/India/GJ-GBRC672a/2021	EPI_ISL_2017776	B.1.617.2	BJ Medical College and Civil Hospital, Ahmedabad	65	Female	2021-04-18	Symptomatic	Cough, Breathlessness	Hypertenstion	QUANTIPLUS KIT, Huwel Lifesciences (India)	NA	27	26	NA
35	NCD512	Demise	hCoV-19/India/GJ-GBRC673/2021	EPI_ISL_2017778	B.1.617.2	BJ Medical College and Civil Hospital, Ahmedabad	55	Male	2021-04-19	Symptomatic	Breathlessness	NA	QUANTIPLUS KIT, Huwel Lifesciences (India)	NA	24	24	NA
36	NCD513	Demise	hCoV-19/India/GJ-GBRC674a/2021	EPI_ISL_2017779	B.1.617.2	BJ Medical College and Civil Hospital, Ahmedabad	57	Female	2021-04-21	Symptomatic	Breathlessness, Cough	NA	QUANTIPLUS KIT, Huwel Lifesciences (India)	NA	28	28	NA
37	NCD526	Demise	hCoV-19/India/GJ-GBRC710/2021	EPI_ISL_2391488	B.1.617.2	BJ Medical College and Civil Hospital, Ahmedabad	69	Male	2021-03-23	Symptomatic	Body ach, weakness, Fever	NA	QUANTIPLUS KIT, Huwel Lifesciences (India)	NA	24	24	NA
38	NCD535	Demise	hCoV-19/India/GJ-GBRC752/2021	EPI_ISL_2509938	B.1.617.2	BJ Medical College and Civil Hospital, Ahmedabad	48	Female	2021-04-19	Asymptomatic	NA	NA	QUANTIPLUS KIT, Huwel Lifesciences (India)	NA	16	16	NA
39	NCD538	Demise	hCoV-19/India/GJ-GBRC677/2021	EPI_ISL_2017783	B.1.617.2	BJ Medical College and Civil Hospital, Ahmedabad	65	Male	2021-04-22	Asymptomatic	NA	NA	QUANTIPLUS KIT, Huwel Lifesciences (India)	NA	22	20	NA
40	NCD541	Demise	hCoV-19/India/GJ-GBRC678a/2021	EPI_ISL_2017784	B.1.617.2	BJ Medical College and Civil Hospital, Ahmedabad	62	Female	2021-04-22	Asymptomatic	NA	NA	QUANTIPLUS KIT, Huwel Lifesciences (India)	NA	24	22	NA
41	NCD542	Demise	hCoV-19/India/GJ-GBRC679a/2021	EPI_ISL_2017786	B.1.617.2	BJ Medical College and Civil Hospital, Ahmedabad	54	Male	2021-04-22	Asymptomatic	NA	NA	QUANTIPLUS KIT, Huwel Lifesciences (India)	NA	18	18	NA
42	NCD544	Demise	hCoV-19/India/GJ-GBRC680/2021	EPI_ISL_2017788	B.1.617.2	BJ Medical College and Civil Hospital, Ahmedabad	35	Female	2021-04-23	Asymptomatic	NA	NA	QUANTIPLUS KIT, Huwel Lifesciences (India)	NA	28	26	NA
43	NCD545	Demise	hCoV-19/India/GJ-GBRC688/2021	EPI_ISL_2389632	B.1.617.2	BJ Medical College and Civil Hospital, Ahmedabad	57	Male	2021-04-23	Symptomatic	Cough, Breathlessness	NA	QUANTIPLUS KIT, Huwel Lifesciences (India)	NA	28	28	NA
44	NCD547	Demise	hCoV-19/India/GJ-GBRC690/2021	EPI_ISL_2389636	B.1.617.2	BJ Medical College and Civil Hospital, Ahmedabad	82	Female	2021-04-24	Symptomatic	Fever, Cough	Hypertenstion, Diabetes	QUANTIPLUS KIT, Huwel Lifesciences (India)	NA	28	26	NA
45	NCD548	Demise	hCoV-19/India/GJ-GBRC691/2021	EPI_ISL_2389638	B.1.617.2	BJ Medical College and Civil Hospital, Ahmedabad	48	Male	2021-04-24	Symptomatic	Cough, Breathlessness, Fever	Thyroid	QUANTIPLUS KIT, Huwel Lifesciences (India)	NA	22	20	NA
46	NCD549	Demise	hCoV-19/India/GJ-GBRC692/2021	EPI_ISL_2389640	B.1.617.2	BJ Medical College and Civil Hospital, Ahmedabad	50	Male	2021-04-18	Asymptomatic	NA	NA	QUANTIPLUS KIT, Huwel Lifesciences (India)	NA	26	26	NA
47	NCD550	Demise	hCoV-19/India/GJ-GBRC693/2021	EPI_ISL_2389641	B.1.617.2	BJ Medical College and Civil Hospital, Ahmedabad	56	Female	2021-04-18	Asymptomatic	NA	NA	QUANTIPLUS KIT, Huwel Lifesciences (India)	NA	30	29	NA
48	NCD552	Demise	hCoV-19/India/GJ-GBRC695/2021	EPI_ISL_2389645	B.1.617.2	BJ Medical College and Civil Hospital, Ahmedabad	72	Male	2021-04-21	Symptomatic	Breathlessness, cough, Fever	Hypertenstion	QUANTIPLUS KIT, Huwel Lifesciences (India)	NA	30	30	NA
49	NCD554	Demise	hCoV-19/India/GJ-GBRC696/2021	EPI_ISL_2389647	B.1.617.2	BJ Medical College and Civil Hospital, Ahmedabad	50	Female	2021-04-22	Asymptomatic	NA	NA	QUANTIPLUS KIT, Huwel Lifesciences (India)	NA	26	24	NA
50	NCD560	Demise	hCoV-19/India/GJ-GBRC700/2021	EPI_ISL_2389655	B.1.617.2	BJ Medical College and Civil Hospital, Ahmedabad	35	Male	2021-04-24	Asymptomatic	NA	NA	QUANTIPLUS KIT, Huwel Lifesciences (India)	NA	24	22	NA
51	NCD561	Demise	hCoV-19/India/GJ-GBRC701/2021	EPI_ISL_2389657	B.1.617.2	BJ Medical College and Civil Hospital, Ahmedabad	56	Male	2021-04-25	Asymptomatic	NA	NA	QUANTIPLUS KIT, Huwel Lifesciences (India)	NA	26	24	NA
52	NCD563	Recovered	hCoV-19/India/GJ-GBRC753/2021	EPI_ISL_2509939	B.1.617.2	Smt. NHL Municipal Medical College, Ahmedabad	18	Male	2021-04-23	Symptomatic	Sore throat,Cough,running nose,fever	NA	Meril COVID-19 One-step RT-PCR Kit, Meril Diagnostics (India)	NA	21	25	NA
53	NCD564	Recovered	hCoV-19/India/GJ-GBRC754/2021	EPI_ISL_2509940	B.1.617.2	Smt. NHL Municipal Medical College, Ahmedabad	22	Female	2021-04-23	Symptomatic	Cough, fever	NA	Meril COVID-19 One-step RT-PCR Kit, Meril Diagnostics (India)	NA	20	22	NA
54	NCD565	Recovered	hCoV-19/India/GJ-GBRC755/2021	EPI_ISL_2509941	B.1.617.2	Smt. NHL Municipal Medical College, Ahmedabad	27	Female	2021-04-23	Symptomatic	Fever, bodyache	NA	Meril COVID-19 One-step RT-PCR Kit, Meril Diagnostics (India)	NA	19	24	NA
55	NCD566	Recovered	hCoV-19/India/GJ-GBRC756/2021	EPI_ISL_2509942	B.1.617.2	Smt. NHL Municipal Medical College, Ahmedabad	12	Male	2021-04-23	Symptomatic	Fever	NA	Meril COVID-19 One-step RT-PCR Kit, Meril Diagnostics (India)	NA	18	22	NA
56	NCD568	Recovered	hCoV-19/India/GJ-GBRC758/2021	EPI_ISL_2509944	B.1.617.2	Smt. NHL Municipal Medical College, Ahmedabad	41	Male	2021-04-23	Symptomatic	Smellless, bodyache	NA	Meril COVID-19 One-step RT-PCR Kit, Meril Diagnostics (India)	NA	21	25	NA
57	NCD569	Recovered	hCoV-19/India/GJ-GBRC759/2021	EPI_ISL_2509945	B.1.617.2	Smt. NHL Municipal Medical College, Ahmedabad	37	Male	2021-04-23	Symptomatic	Fever	NA	Meril COVID-19 One-step RT-PCR Kit, Meril Diagnostics (India)	NA	17	21	NA
58	NCD574	Recovered	hCoV-19/India/GJ-GBRC772/2021	EPI_ISL_2543895	B.1.617.2	Smt. NHL Municipal Medical College, Ahmedabad	34	Male	2021-04-24	NA	NA	NA	Meril COVID-19 One-step RT-PCR Kit, Meril Diagnostics (India)	NA	22	24	NA
59	NCD576	Recovered	hCoV-19/India/GJ-GBRC774a/2021	EPI_ISL_2543897	B.1.617.2	Smt. NHL Municipal Medical College, Ahmedabad	21	Male	2021-04-18	NA	NA	NA	Meril COVID-19 One-step RT-PCR Kit, Meril Diagnostics (India)	NA	18	21	NA
60	NCD581	Recovered	hCoV-19/India/GJ-GBRC760/2021	EPI_ISL_2509946	B.1.617.2	Smt. NHL Municipal Medical College, Ahmedabad	30	Male	2021-04-18	Symptomatic	Fever	NA	Meril COVID-19 One-step RT-PCR Kit, Meril Diagnostics (India)	NA	19	21	NA
61	NCD587	Recovered	hCoV-19/India/GJ-GBRC763a/2021	EPI_ISL_2509951	B.1.617.2	Smt. NHL Municipal Medical College, Ahmedabad	47	Male	2021-04-18	Symptomatic	Cough	NA	Meril COVID-19 One-step RT-PCR Kit, Meril Diagnostics (India)	NA	23	22	NA
62	NCD588	Recovered	hCoV-19/India/GJ-GBRC764/2021	EPI_ISL_2509953	B.1.617.2	Smt. NHL Municipal Medical College, Ahmedabad	53	Female	2021-04-18	Symptomatic	Fever	Diabetes, Hypertention	Meril COVID-19 One-step RT-PCR Kit, Meril Diagnostics (India)	NA	21	24	NA
63	NCD590	Recovered	hCoV-19/India/GJ-GBRC765a/2021	EPI_ISL_2509954	B.1.617.2	Smt. NHL Municipal Medical College, Ahmedabad	48	Male	2021-04-18	Symptomatic	Fever	NA	Meril COVID-19 One-step RT-PCR Kit, Meril Diagnostics (India)	NA	19	23	NA
64	NCD593	Recovered	hCoV-19/India/GJ-GBRC767a/2021	EPI_ISL_2509957	B.1.617.2	Smt. NHL Municipal Medical College, Ahmedabad	37	Male	2021-04-17	Symptomatic	Fever, bodyache	NA	Meril COVID-19 One-step RT-PCR Kit, Meril Diagnostics (India)	NA	20	23	NA
65	NCD594	Recovered	hCoV-19/India/GJ-GBRC711/2021	EPI_ISL_2391489	B.1.617.2	GMERS Medical College and Hospital, Gotri, Vadodara	70	Male	2021-04-22	Asymtomatic	NA	NA	QUANTIPLUS KIT, Huwel Lifesciences (India)	NA	18	18	NA
66	NCD595	Recovered	hCoV-19/India/GJ-GBRC712a/2021	EPI_ISL_2391490	B.1.617.2	GMERS Medical College and Hospital, Gotri, Vadodara	22	Male	2021-04-23	Asymtomatic	NA	NA	QUANTIPLUS KIT, Huwel Lifesciences (India)	NA	20	19	NA
67	NCD608	Demise	hCoV-19/India/GJ-GBRC721/2021	EPI_ISL_2391503	B.1.617.2	GMERS Medical College and Hospital, Gotri, Vadodara	51	Male	2021-04-22	Symtomatic	NA	NA	QUANTIPLUS KIT, Huwel Lifesciences (India)	NA	19	18	NA
68	NCD660	Demise	hCoV-19/India/GJ-GBRC731/2021	EPI_ISL_2405127	B.1.617.2	BJ Medical College and Civil Hospital, Ahmedabad	70	Male	2021-04-17	NA	NA	NA	QUANTIPLUS KIT, Huwel Lifesciences (India)	NA	22	22	NA
69	NCD661	Demise	hCoV-19/India/GJ-GBRC732a/2021	EPI_ISL_2405128	B.1.617.2	BJ Medical College and Civil Hospital, Ahmedabad	81	Male	2021-04-18	NA	NA	NA	QUANTIPLUS KIT, Huwel Lifesciences (India)	NA	30	28	NA
70	NCD662	Demise	hCoV-19/India/GJ-GBRC733/2021	EPI_ISL_2405130	B.1.617.2	BJ Medical College and Civil Hospital, Ahmedabad	64	Male	2021-04-18	NA	NA	NA	QUANTIPLUS KIT, Huwel Lifesciences (India)	NA	30	30	NA
71	NCD663	Demise	hCoV-19/India/GJ-GBRC734a/2021	EPI_ISL_2405131	B.1.617.2	BJ Medical College and Civil Hospital, Ahmedabad	51	Male	2021-04-20	NA	NA	NA	QUANTIPLUS KIT, Huwel Lifesciences (India)	NA	26	24	NA
72	NCD664	Demise	hCoV-19/India/GJ-GBRC735a/2021	EPI_ISL_2405133	B.1.617.2	BJ Medical College and Civil Hospital, Ahmedabad	53	Male	2021-04-20	NA	NA	NA	QUANTIPLUS KIT, Huwel Lifesciences (India)	NA	24	24	NA
73	NCD665	Demise	hCoV-19/India/GJ-GBRC736/2021	EPI_ISL_2405135	B.1.617.2	BJ Medical College and Civil Hospital, Ahmedabad	71	Male	2021-04-21	NA	NA	NA	QUANTIPLUS KIT, Huwel Lifesciences (India)	NA	30	30	NA
74	NCD666	Demise	hCoV-19/India/GJ-GBRC737/2021	EPI_ISL_2405136	B.1.617.2	BJ Medical College and Civil Hospital, Ahmedabad	79	Male	2021-04-22	NA	NA	NA	QUANTIPLUS KIT, Huwel Lifesciences (India)	NA	28	26	NA
75	NCD668	Demise	hCoV-19/India/GJ-GBRC738/2021	EPI_ISL_2405137	B.1.617.2	BJ Medical College and Civil Hospital, Ahmedabad	59	Male	2021-04-26	NA	NA	NA	QUANTIPLUS KIT, Huwel Lifesciences (India)	NA	30	26	NA
76	NCD669	Demise	hCoV-19/India/GJ-GBRC739a/2021	EPI_ISL_2405138	B.1.617.2	BJ Medical College and Civil Hospital, Ahmedabad	46	Male	2021-04-27	NA	NA	NA	QUANTIPLUS KIT, Huwel Lifesciences (India)	NA	26	26	NA
77	NCD670	Demise	hCoV-19/India/GJ-GBRC740/2021	EPI_ISL_2405140	B.1.617.2	BJ Medical College and Civil Hospital, Ahmedabad	53	Male	2021-04-30	NA	NA	NA	QUANTIPLUS KIT, Huwel Lifesciences (India)	NA	28	26	NA
78	NCD671	Demise	hCoV-19/India/GJ-GBRC741/2021	EPI_ISL_2405141	B.1.617.2	BJ Medical College and Civil Hospital, Ahmedabad	56	Female	2021-04-28	NA	NA	NA	QUANTIPLUS KIT, Huwel Lifesciences (India)	NA	24	24	NA
79	NCD672	Demise	hCoV-19/India/GJ-GBRC742/2021	EPI_ISL_2405142	B.1.617.2	BJ Medical College and Civil Hospital, Ahmedabad	52	Female	2021-04-28	NA	NA	NA	QUANTIPLUS KIT, Huwel Lifesciences (India)	NA	30	30	NA
80	NCD673	Demise	hCoV-19/India/GJ-GBRC743/2021	EPI_ISL_2405143	B.1.617.2	BJ Medical College and Civil Hospital, Ahmedabad	73	Male	2021-05-03	NA	NA	NA	QUANTIPLUS KIT, Huwel Lifesciences (India)	NA	31	31	NA
81	NCD732	Recovered	hCoV-19/India/GJ-GBRC810a/2021	EPI_ISL_2562085	B.1.617.2	GMERS Medical College and Hospital, Gotri, Vadodara	30	Male	2021-05-06	Asymtomatic	NA	NA	DiAGSure nCoV-19 Assay, GCC Biotech (India)	16	NA	17	NA
82	NCD734	Recovered	hCoV-19/India/GJ-GBRC811/2021	EPI_ISL_2562087	B.1.617.2	GMERS Medical College and Hospital, Gotri, Vadodara	52	Male	2021-05-04	Asymtomatic	NA	NA	DiAGSure nCoV-19 Assay, GCC Biotech (India)	16	NA	16	NA
83	NCD736	Recovered	hCoV-19/India/GJ-GBRC812a/2021	EPI_ISL_2562088	B.1.617.2	GMERS Medical College and Hospital, Gotri, Vadodara	24	Male	2021-05-04	Asymtomatic	NA	NA	DiAGSure nCoV-19 Assay, GCC Biotech (India)	23	NA	22	NA
84	NCD738	Recovered	hCoV-19/India/GJ-GBRC814/2021	EPI_ISL_2562091	B.1.617.2	GMERS Medical College and Hospital, Gotri, Vadodara	35	Male	2021-05-04	Asymtomatic	NA	NA	DiAGSure nCoV-19 Assay, GCC Biotech (India)	17	NA	17	NA
85	NCD740	Recovered	hCoV-19/India/GJ-GBRC816/2021	EPI_ISL_2562093	B.1.617.2	GMERS Medical College and Hospital, Gotri, Vadodara	14	Female	2021-05-04	Asymtomatic	NA	NA	DiAGSure nCoV-19 Assay, GCC Biotech (India)	21	NA	22	NA
86	NCD744	Recovered	hCoV-19/India/GJ-GBRC820/2021	EPI_ISL_2562098	B.1.617.2	GMERS Medical College and Hospital, Gotri, Vadodara	32	Male	2021-05-05	Asymtomatic	NA	NA	DiAGSure nCoV-19 Assay, GCC Biotech (India)	22	NA	22	NA
87	NCD745	Recovered	hCoV-19/India/GJ-GBRC821a/2021	EPI_ISL_2562099	B.1.617.2	GMERS Medical College and Hospital, Gotri, Vadodara	15	Female	2021-05-05	Asymtomatic	NA	NA	DiAGSure nCoV-19 Assay, GCC Biotech (India)	19	NA	20	NA
88	NCD746	Recovered	hCoV-19/India/GJ-GBRC822/2021	EPI_ISL_2562101	B.1.617.2	GMERS Medical College and Hospital, Gotri, Vadodara	21	Male	2021-05-06	Asymtomatic	NA	NA	DiAGSure nCoV-19 Assay, GCC Biotech (India)	20	NA	19	NA
89	NCD747	Recovered	hCoV-19/India/GJ-GBRC823/2021	EPI_ISL_2562102	B.1.617.2	GMERS Medical College and Hospital, Gotri, Vadodara	35	Female	2021-05-06	Asymtomatic	NA	NA	DiAGSure nCoV-19 Assay, GCC Biotech (India)	15	NA	15	NA
90	NCD748	Recovered	hCoV-19/India/GJ-GBRC824/2021	EPI_ISL_2562103	B.1.617.2	GMERS Medical College and Hospital, Gotri, Vadodara	55	Male	2021-05-04	Asymtomatic	NA	NA	DiAGSure nCoV-19 Assay, GCC Biotech (India)	23	NA	23	NA
91	NCD750	Recovered	hCoV-19/India/GJ-GBRC826/2021	EPI_ISL_2562106	B.1.617.2	GMERS Medical College and Hospital, Gotri, Vadodara	75	Male	2021-05-06	Asymtomatic	NA	NA	DiAGSure nCoV-19 Assay, GCC Biotech (India)	21	NA	21	NA
92	NCD751	Recovered	hCoV-19/India/GJ-GBRC827a/2021	EPI_ISL_2562107	B.1.617.2	GMERS Medical College and Hospital, Gotri, Vadodara	70	Male	2021-05-06	Asymtomatic	NA	NA	DiAGSure nCoV-19 Assay, GCC Biotech (India)	22	NA	20	NA
93	NCD754	Recovered	hCoV-19/India/GJ-GBRC830/2021	EPI_ISL_2562111	B.1.617.2	GMERS Medical College and Hospital, Gotri, Vadodara	27	Male	2021-05-06	Asymtomatic	NA	NA	DiAGSure nCoV-19 Assay, GCC Biotech (India)	23	NA	21	NA
94	NCD761	Demise	hCoV-19/India/GJ-GBRC795a/2021	EPI_ISL_2544818	B.1.617.2	GMERS Medical College and Civil Hospital, Gandhinagar	55	Male	2021-05-04	Symptomatic	NA	NA	QUANTIPLUS KIT, Huwel Lifesciences (India)	NA	27	26	NA
95	NCD762	Demise	hCoV-19/India/GJ-GBRC796/2021	EPI_ISL_2544820	B.1.617.2	GMERS Medical College and Civil Hospital, Gandhinagar	52	Female	2021-05-06	Asymtomatic	NA	NA	QUANTIPLUS KIT, Huwel Lifesciences (India)	NA	26	24	NA
96	NCD766	Demise	hCoV-19/India/GJ-GBRC797/2021	EPI_ISL_2544821	B.1.617.2	GMERS Medical College and Civil Hospital, Gandhinagar	64	Male	2021-05-08	Asymtomatic	NA	NA	QUANTIPLUS KIT, Huwel Lifesciences (India)	NA	NA	NA	NA
97	NCD771	Demise	hCoV-19/India/GJ-GBRC779/2021	EPI_ISL_2543903	B.1.617.2	Smt. NHL Municipal Medical College, Ahmedabad	58	Male	2021-05-09	NA	NA	NA	Meril COVID-19 One-step RT-PCR Kit, Meril Diagnostics (India)	16	20	NA	NA
98	C5663	Control	NA	NA	NA	Urban Health Centre (UHC), Sector 2, Gandhinagar	27	Female	2021-05-23	NA	NA	NA	QUANTIPLUS KIT, Huwel Lifesciences (India)	NA	NA	NA	NA
99	C5664	Control	NA	NA	NA	Urban Health Centre (UHC), Sector 2, Gandhinagar	36	Male	2021-05-23	NA	NA	NA	QUANTIPLUS KIT, Huwel Lifesciences (India)	NA	NA	38.36	NA
100	C5665	Control	NA	NA	NA	Urban Health Centre (UHC), Sector 2, Gandhinagar	40	Male	2021-05-23	NA	NA	NA	QUANTIPLUS KIT, Huwel Lifesciences (India)	NA	38.12	37.71	NA
101	C5667	Control	NA	NA	NA	Urban Health Centre (UHC), Sector 2, Gandhinagar	53	Female	2021-05-23	NA	NA	NA	QUANTIPLUS KIT, Huwel Lifesciences (India)	NA	39.59	37.19	NA
102	C5671	Control	NA	NA	NA	Urban Health Centre (UHC), Sector 2, Gandhinagar	25	Male	2021-05-23	NA	NA	NA	QUANTIPLUS KIT, Huwel Lifesciences (India)	NA	NA	38.76	NA
103	C5673	Control	NA	NA	NA	Urban Health Centre (UHC), Sector 2, Gandhinagar	34	Male	2021-05-23	NA	NA	NA	QUANTIPLUS KIT, Huwel Lifesciences (India)	NA	NA	37.94	NA
104	C5674	Control	NA	NA	NA	Urban Health Centre (UHC), Sector 2, Gandhinagar	28	Male	2021-05-23	NA	NA	NA	QUANTIPLUS KIT, Huwel Lifesciences (India)	NA	NA	37.62	NA
105	C5675	Control	NA	NA	NA	Urban Health Centre (UHC), Sector 2, Gandhinagar	31	Female	2021-05-23	NA	NA	NA	QUANTIPLUS KIT, Huwel Lifesciences (India)	NA	NA	NA	NA
106	C5676	Control	NA	NA	NA	Urban Health Centre (UHC), Sector 2, Gandhinagar	27	Female	2021-05-23	NA	NA	NA	QUANTIPLUS KIT, Huwel Lifesciences (India)	NA	NA	39.48	NA
107	C5678	Control	NA	NA	NA	Urban Health Centre (UHC), Sector 2, Gandhinagar	38	Male	2021-05-23	NA	NA	NA	QUANTIPLUS KIT, Huwel Lifesciences (India)	NA	39.05	38.42	NA
108	C5679	Control	NA	NA	NA	Urban Health Centre (UHC), Sector 2, Gandhinagar	22	Male	2021-05-23	NA	NA	NA	QUANTIPLUS KIT, Huwel Lifesciences (India)	NA	NA	NA	NA
109	C5680	Control	NA	NA	NA	Urban Health Centre (UHC), Sector 2, Gandhinagar	50	Male	2021-05-23	NA	NA	NA	QUANTIPLUS KIT, Huwel Lifesciences (India)	NA	39.55	39.3	NA
110	C6187	Control	NA	NA	NA	Urban Health Centre (UHC), Sector 2, Gandhinagar	23	Male	2021-06-06	NA	NA	NA	QUANTIPLUS KIT, Huwel Lifesciences (India)	NA	36.01	39.85	NA
111	C6192	Control	NA	NA	NA	Urban Health Centre (UHC), Sector 2, Gandhinagar	37	Male	2021-06-06	NA	NA	NA	QUANTIPLUS KIT, Huwel Lifesciences (India)	NA	36.17	38.38	NA
112	C6194	Control	NA	NA	NA	Urban Health Centre (UHC), Sector 2, Gandhinagar	35	Male	2021-06-06	NA	NA	NA	QUANTIPLUS KIT, Huwel Lifesciences (India)	NA	36.57	38.59	NA
113	C6207	Control	NA	NA	NA	Urban Health Centre (UHC), Sector 2, Gandhinagar	30	Male	2021-06-06	NA	NA	NA	QUANTIPLUS KIT, Huwel Lifesciences (India)	NA	35.59	36.76	NA
114	C6261	Control	NA	NA	NA	Urban Health Centre (UHC), Sector 2, Gandhinagar	67	Female	2021-06-07	NA	NA	NA	QUANTIPLUS KIT, Huwel Lifesciences (India)	NA	39.07	37.26	NA
115	C6266	Control	NA	NA	NA	Urban Health Centre (UHC), Sector 2, Gandhinagar	21	Male	2021-06-07	NA	NA	NA	QUANTIPLUS KIT, Huwel Lifesciences (India)	NA	NA	37.6	NA
116	C6274	Control	NA	NA	NA	Urban Health Centre (UHC), Sector 2, Gandhinagar	65	Male	2021-06-08	NA	NA	NA	QUANTIPLUS KIT, Huwel Lifesciences (India)	NA	40	37.12	NA
117	C6276	Control	NA	NA	NA	Urban Health Centre (UHC), Sector 2, Gandhinagar	46	Male	2021-06-08	NA	NA	NA	QUANTIPLUS KIT, Huwel Lifesciences (India)	NA	38.48	36.49	NA
118	C6278	Control	NA	NA	NA	Urban Health Centre (UHC), Sector 2, Gandhinagar	24	Male	2021-06-08	NA	NA	NA	QUANTIPLUS KIT, Huwel Lifesciences (India)	NA	38.36	38.12	NA
119	C6285	Control	NA	NA	NA	Urban Health Centre (UHC), Sector 2, Gandhinagar	55	Female	2021-06-08	NA	NA	NA	QUANTIPLUS KIT, Huwel Lifesciences (India)	NA	NA	36.62	NA
120	C6292	Control	NA	NA	NA	Urban Health Centre (UHC), Sector 2, Gandhinagar	39	Male	2021-06-08	NA	NA	NA	QUANTIPLUS KIT, Huwel Lifesciences (India)	NA	38.04	35.86	NA
121	C6294	Control	NA	NA	NA	Urban Health Centre (UHC), Sector 2, Gandhinagar	24	Male	2021-06-08	NA	NA	NA	QUANTIPLUS KIT, Huwel Lifesciences (India)	NA	37.3	36.16	NA
122	C6295	Control	NA	NA	NA	Urban Health Centre (UHC), Sector 2, Gandhinagar	33	Male	2021-06-08	NA	NA	NA	QUANTIPLUS KIT, Huwel Lifesciences (India)	NA	39.27	35.43	NA
123	C6299	Control	NA	NA	NA	Urban Health Centre (UHC), Sector 2, Gandhinagar	30	Male	2021-06-08	NA	NA	NA	QUANTIPLUS KIT, Huwel Lifesciences (India)	NA	39.79	36.46	NA
124	C6300	Control	NA	NA	NA	Urban Health Centre (UHC), Sector 2, Gandhinagar	21	Male	2021-06-08	NA	NA	NA	QUANTIPLUS KIT, Huwel Lifesciences (India)	NA	38.65	36.22	NA
125	C6305	Control	NA	NA	NA	Urban Health Centre (UHC), Sector 2, Gandhinagar	26	Male	2021-06-08	NA	NA	NA	QUANTIPLUS KIT, Huwel Lifesciences (India)	NA	37.34	36.13	NA
126	C6311	Control	NA	NA	NA	Urban Health Centre (UHC), Sector 2, Gandhinagar	27	Male	2021-06-09	NA	NA	NA	QUANTIPLUS KIT, Huwel Lifesciences (India)	NA	NA	NA	NA
127	C6319	Control	NA	NA	NA	Urban Health Centre (UHC), Sector 2, Gandhinagar	20	Male	2021-06-09	NA	NA	NA	QUANTIPLUS KIT, Huwel Lifesciences (India)	NA	NA	NA	NA
128	C6323	Control	NA	NA	NA	Urban Health Centre (UHC), Sector 2, Gandhinagar	20	Male	2021-06-09	NA	NA	NA	QUANTIPLUS KIT, Huwel Lifesciences (India)	NA	NA	NA	NA
129	C6486	Control	NA	NA	NA	Urban Health Centre (UHC), Sector 2, Gandhinagar	19	Male	2021-06-14	NA	NA	NA	QUANTIPLUS KIT, Huwel Lifesciences (India)	NA	NA	NA	NA
130	C6487	Control	NA	NA	NA	Urban Health Centre (UHC), Sector 2, Gandhinagar	22	Male	2021-06-14	NA	NA	NA	QUANTIPLUS KIT, Huwel Lifesciences (India)	NA	NA	NA	NA
131	C6488	Control	NA	NA	NA	Urban Health Centre (UHC), Sector 2, Gandhinagar	24	Male	2021-06-14	NA	NA	NA	QUANTIPLUS KIT, Huwel Lifesciences (India)	NA	NA	NA	NA
132	C6492	Control	NA	NA	NA	Urban Health Centre (UHC), Sector 2, Gandhinagar	23	Male	2021-06-14	NA	NA	NA	QUANTIPLUS KIT, Huwel Lifesciences (India)	NA	NA	NA	NA
133	C6494	Control	NA	NA	NA	Urban Health Centre (UHC), Sector 2, Gandhinagar	20	Male	2021-06-14	NA	NA	NA	QUANTIPLUS KIT, Huwel Lifesciences (India)	NA	NA	NA	NA
134	C6496	Control	NA	NA	NA	Urban Health Centre (UHC), Sector 2, Gandhinagar	26	Male	2021-06-14	NA	NA	NA	QUANTIPLUS KIT, Huwel Lifesciences (India)	NA	NA	NA	NA
135	C6497	Control	NA	NA	NA	Urban Health Centre (UHC), Sector 2, Gandhinagar	35	Male	2021-06-14	NA	NA	NA	QUANTIPLUS KIT, Huwel Lifesciences (India)	NA	NA	NA	NA
136	C6499	Control	NA	NA	NA	Urban Health Centre (UHC), Sector 2, Gandhinagar	39	Male	2021-06-14	NA	NA	NA	QUANTIPLUS KIT, Huwel Lifesciences (India)	NA	NA	NA	NA
137	C6502	Control	NA	NA	NA	Urban Health Centre (UHC), Sector 2, Gandhinagar	25	Male	2021-06-14	NA	NA	NA	QUANTIPLUS KIT, Huwel Lifesciences (India)	NA	NA	NA	NA
138	C6503	Control	NA	NA	NA	Urban Health Centre (UHC), Sector 2, Gandhinagar	48	Female	2021-06-14	NA	NA	NA	QUANTIPLUS KIT, Huwel Lifesciences (India)	NA	NA	NA	NA
139	C6504	Control	NA	NA	NA	Urban Health Centre (UHC), Sector 2, Gandhinagar	19	Male	2021-06-14	NA	NA	NA	QUANTIPLUS KIT, Huwel Lifesciences (India)	NA	NA	NA	NA
140	C6505	Control	NA	NA	NA	Urban Health Centre (UHC), Sector 2, Gandhinagar	36	Female	2021-06-14	NA	NA	NA	QUANTIPLUS KIT, Huwel Lifesciences (India)	NA	NA	NA	NA
141	C6507	Control	NA	NA	NA	Urban Health Centre (UHC), Sector 2, Gandhinagar	63	Female	2021-06-14	NA	NA	NA	QUANTIPLUS KIT, Huwel Lifesciences (India)	NA	NA	NA	NA

## Sheet: Table S2
Table S2: Details of sequencing reads generated and its mean length for each sample.
Sample	Reads	Mean read length (bp)
NCD574	312585	333
NCD576	501543	232
NCD732	558577	107
NCD734	439114	201
NCD736	590652	333
NCD738	305674	308
NCD740	286146	339
NCD744	80113	244
NCD745	441454	358
NCD746	251049	335
NCD747	625584	324
NCD748	716900	321
NCD750	773581	342
NCD751	655449	341
NCD754	132864	339
NCD673	779613	346
NCD497	146930	318
C6499	539165	370
C6486	267517	366
C6488	127342	337
C6504	128330	354
C6492	272687	112
C6502	181253	365
C6487	99577	340
C6311	86561	306
C6494	164290	359
C6497	234939	356
C6496	242981	376
C6323	524438	324
C6319	393440	275
C6503	747078	368
C6507	239328	353
NCD761	630725	114
NCD762	94512	245
NCD766	680873	343
NCD771	684270	349
NCD108	368207	334
NCD109	226373	328
NCD112	391848	335
NCD115	241281	345
NCD119	214736	368
NCD127	336943	229
NCD145	268098	360
NCD192	65089	113
C6505	295793	377
NCD587	516712	362
NCD588	89359	365
NCD590	451100	378
NCD593	639983	355
NCD399	520623	358
NCD660	221288	366
NCD661	149922	348
NCD662	658411	350
NCD663	248741	361
NCD664	277811	352
NCD665	187994	339
NCD666	88114	335
NCD668	238612	341
NCD669	133092	373
NCD670	420771	362
NCD671	379233	371
NCD672	320855	364
NCD535	564036	384
NCD538	355238	323
NCD550	370370	362
NCD552	267326	358
NCD554	185868	341
C5663	198807	362
C5664	365151	356
C5665	480385	363
C5667	274028	367
C5671	169050	364
C5673	221874	365
C5674	305453	371
C5675	347453	376
C5676	469375	378
C5678	379969	377
C5679	399098	368
C5680	712307	370
NCD278	525230	341
NCD280	141757	347
NCD371	150596	340
NCD373	194979	348
NCD375	105964	341
NCD398	744920	351
NCD401	573654	354
NCD403	685957	353
NCD405	150975	330
NCD406	932535	351
NCD408	245857	341
NCD414	470257	349
NCD415	319337	353
NCD416	647196	348
NCD594	703216	347
NCD595	169347	353
NCD396	154717	347
NCD608	237907	373
NCD412	499235	331
NCD491	229270	272
NCD494	75773	344
NCD499	305930	371
NCD500	411585	355
NCD501	443428	356
NCD502	335436	358
NCD506	313516	349
NCD508	455324	365
NCD512	267130	370
NCD526	11473	326
NCD560	236019	368
NCD561	234384	360
C6300	96465	349
C6305	27499	288
C6299	226216	299
C6295	195444	319
C6294	116691	332
C6292	124469	357
C6285	170748	350
C6278	979024	353
C6276	22359	318
C6274	228878	346
C6266	241807	334
C6261	235864	372
C6207	280945	368
C6194	333328	370
C6192	218259	361
C6187	281334	348

## Sheet: Table S3
Table S3: Top most abundant genera in the three group. Relative abundance was calculated using STAMP where Kruskal-Wallis-H test and Benjamini-Hochberg FDR test was applied for multiple test correction.
domain	phylum	className	order	family	genus	p-values	p-values (corrected)	Effect size	Control: mean rel. freq. (%)	Control: std. dev. (%)	Demised: mean rel. freq. (%)	Demised: std. dev. (%)	Recovered: mean rel. freq. (%)	Recovered: std. dev. (%)
Bacteria	Proteobacteria	Gammaproteobacteria	Pseudomonadales	Pseudomonadaceae	Pseudomonas	0.0727639	0.243524	0.30256	31.34	33.71	4.12	10.64	1.15	2.67
Bacteria	unclassified (derived from Bacteria)	unclassified (derived from Bacteria)	unclassified (derived from Bacteria)	unclassified (derived from Bacteria)	unclassified (derived from Bacteria)	0.073172	0.243907	0.0526365	23.23	17.04	25.76	20.16	35.23	23.19
Bacteria	Bacteroidetes	Bacteroidia	Bacteroidales	Prevotellaceae	Prevotella	0.318074	0.531189	0.0239655	6.62	10.58	5.05	8.37	3.04	5.95
Bacteria	Actinobacteria	Actinobacteria (class)	Actinomycetales	Micrococcaceae	Rothia	0.299248	0.554411	0.00337472	5.75	8.24	4.56	9.34	5.63	11.62
Bacteria	Actinobacteria	Actinobacteria (class)	Actinomycetales	Corynebacteriaceae	Corynebacterium	5.26e-06	0.000181845	0.0816352	1.58	3.83	6.58	12.71	1.08	2.2
Bacteria	Actinobacteria	Actinobacteria (class)	Actinomycetales	Actinomycetaceae	Actinomyces	0.149761	0.395864	0.000511411	1.28	2.04	1.29	4.04	1.44	2.19
Bacteria	Proteobacteria	Alphaproteobacteria	unclassified (derived from Alphaproteobacteria)	unclassified (derived from Alphaproteobacteria)	unclassified (derived from Alphaproteobacteria)	0.369204	0.574934	0.00840267	1.14	2.14	2.78	11.09	1.78	3.92
Bacteria	Firmicutes	Bacilli	Lactobacillales	Streptococcaceae	Streptococcus	0.220164	0.522103	0.0112502	1.86	5.53	3.06	13.58	0.58	0.92
Bacteria	Firmicutes	Negativicutes	Selenomonadales	Veillonellaceae	Veillonella	0.0164082	0.0901909	0.0477227	1.73	2.38	1.03	2.02	0.56	1.31
Bacteria	Firmicutes	Clostridia	Clostridiales	Lachnospiraceae	Oribacterium	0.0453336	0.18908	0.0261485	1.77	2.84	0.92	1.87	1.14	1.87
Bacteria	Proteobacteria	Betaproteobacteria	Neisseriales	Neisseriaceae	Neisseria	1.35e-06	8.64e-05	0.0446234	1.26	3.46	0.09	0.51	1.05	3.01
Bacteria	Fusobacteria	Fusobacteria (class)	Fusobacteriales	Fusobacteriaceae	Leptotrichia	0.0134283	0.0844356	0.0238384	1.12	2.63	0.94	2.94	2.16	4.28
Bacteria	Proteobacteria	Betaproteobacteria	Burkholderiales	Burkholderiaceae	Cupriavidus	0.637966	0.748956	0.034205	3.63	15.71	0.13	0.54	0.03	0.09
Bacteria	Bacteroidetes	Sphingobacteria	Sphingobacteriales	Sphingobacteriaceae	Sphingobacterium	0.918853	0.967827	0.0198326	2.51	14.17	0	0.01	0.26	1.32
Bacteria	Fusobacteria	Fusobacteria (class)	Fusobacteriales	Fusobacteriaceae	Fusobacterium	0.000296599	0.00439603	0.097326	2.09	3.83	0.29	0.74	0.92	1.61
Bacteria	Proteobacteria	Alphaproteobacteria	Rhizobiales	Brucellaceae	Ochrobactrum	4.6e-08	9.54e-06	0.215341	0.15	0.35	1.17	3.19	12.15	18.29
Bacteria	Proteobacteria	Betaproteobacteria	Burkholderiales	Burkholderiaceae	Burkholderia	2.13e-06	0.00010421	0.0666716	0.01	0.02	1.13	6.87	4.79	10.41
Bacteria	Actinobacteria	Actinobacteria (class)	Actinomycetales	Propionibacteriaceae	Propionibacterium	4.95e-05	0.00102753	0.031096	0.22	0.51	2.6	8.55	0.92	3.13
Bacteria	Proteobacteria	Gammaproteobacteria	Alteromonadales	Pseudoalteromonadaceae	Pseudoalteromonas	7.79e-05	0.00150399	0.147034	0.21	0.48	2.37	3.87	0.2	0.6
Bacteria	Firmicutes	Bacilli	Bacillales	Staphylococcaceae	Staphylococcus	1.37e-05	0.000391194	0.0334454	0.16	0.45	2.47	9.5	0.08	0.24
Bacteria	Actinobacteria	Actinobacteria (class)	Actinomycetales	Microbacteriaceae	Microbacterium	3.34e-06	0.000145851	0.0559946	0.11	0.3	1.35	1.87	0.79	3.38
Bacteria	Proteobacteria	Gammaproteobacteria	Vibrionales	Vibrionaceae	Vibrio	5.56e-06	0.000184598	0.205487	0.09	0.21	1.03	1.38	0.08	0.18
Bacteria	Firmicutes	Bacilli	Lactobacillales	Lactobacillaceae	Lactobacillus	7.72e-09	3.2e-06	0.0471153	0.08	0.31	1.17	3.74	0.03	0.1
Bacteria	Proteobacteria	Gammaproteobacteria	Pseudomonadales	Moraxellaceae	Acinetobacter	4.37e-09	3.63e-06	0.0693213	0.05	0.08	3.89	10.48	0.12	0.34
Bacteria	Firmicutes	Bacilli	Lactobacillales	Enterococcaceae	Enterococcus	0.0847552	0.274792	0.0391882	0.01	0.02	5.22	19.36	0.01	0.02
Bacteria	Proteobacteria	Gammaproteobacteria	Enterobacteriales	Enterobacteriaceae	Escherichia	9.82e-07	7.41e-05	0.0214156	0	0.01	1.52	7.67	0.01	0.03
Bacteria	Proteobacteria	Alphaproteobacteria	Caulobacterales	Caulobacteraceae	Brevundimonas	0.0217872	0.113021	0.0551908	0.36	0.96	0.46	1.64	2.88	8.43
Bacteria	Proteobacteria	Alphaproteobacteria	Rhodospirillales	Rhodospirillaceae	Azospirillum	6.96e-05	0.00137544	0.0589163	0.14	0.45	0.3	1.13	1.4	3.74
Bacteria	Proteobacteria	Alphaproteobacteria	Rhizobiales	Rhizobiaceae	Rhizobium	0.000739406	0.00840695	0.0588279	0.09	0.42	0.47	2.67	1.98	4.7
Bacteria	Proteobacteria	Betaproteobacteria	unclassified (derived from Betaproteobacteria)	unclassified (derived from Betaproteobacteria)	unclassified (derived from Betaproteobacteria)	0.00469874	0.0374996	0.095078	0.08	0.27	0.22	0.74	1.53	3.49
Bacteria	Proteobacteria	Betaproteobacteria	Burkholderiales	Alcaligenaceae	Achromobacter	0.153338	0.401485	0.0457896	0.06	0.18	0.09	0.21	1.72	6.44

## Sheet: Table S4
Table S4: Differentially abundant genera between two group comparisons i.e. control-demised, control-recovered, and demised-recovered. Analysis was performed in the MicrobiomeAnalyst with p-value cutoff 0.05 and Log LDA score cutoff 4.0 and Kruskal-Wallis rank sum test.
Control-Demised							Control-Recovered							Demised-recovered
Genus	Pvalues	FDR	Control	Demised	LDAscore		Genus	Pvalues	FDR	Control	Recovered	LDAscore		Genus	Pvalues	FDR	Demised	Recovered	LDAscore
Neisseria	1.6636e-09	1.6636e-07	118220	699.78	-4.77		Ochrobactrum	6.4527e-07	5.8074e-05	15187	1233700	5.78		Phyllobacterium	5.6444e-07	4.03e-05	396.83	21839	4.03
Haemophilus	7.9716e-07	3.9858e-05	9742.3	1399.6	-3.62		Bartonella	3.3988e-06	0.00015295	191.03	31374	4.19		Brucella	1.0312e-06	4.03e-05	11210	457800	5.35
Microbacterium	1.5112e-06	4.9703e-05	11487	128760	4.77		Brucella	5.2948e-06	0.00015885	700.43	434390	5.34		Vibrio	1.0795e-06	4.03e-05	85615	5582.9	-4.6
Serratia	1.9881e-06	4.9703e-05	2035.7	88972	4.64		Phyllobacterium	1.2746e-05	0.00028679	541.24	20035	3.99		Aminobacter	1.6012e-06	4.4833e-05	0	6568.1	3.52
Corynebacterium	5.6118e-06	0.00011224	178710	751360	5.46		Burkholderia	2.0903e-05	0.00037625	382.05	379530	5.28		Acinetobacter	7.3162e-06	0.00016388	407440	9195.4	-5.3
Candidatus_Solibacter	8.3525e-06	0.00013921	0	19094	3.98		Aminobacter	0.00011569	0.0016244	191.03	6666.1	3.51		Serratia	9.1545e-06	0.00017088	91270	656.81	-4.66
Acinetobacter	1.4246e-05	0.00017814	4507.6	407170	5.3		Methylosinus	0.00012634	0.0016244	413.89	5289.4	3.39		Microlunatus	1.1034e-05	0.00017501	49901	2627.3	-4.37
Methylobacterium	1.4251e-05	0.00017814	1599.5	31090	4.17		Methylobacterium	0.00031905	0.0035893	1591.9	56553	4.44		Corynebacterium	1.2501e-05	0.00017501	707740	96552	-5.49
Vibrio	1.7145e-05	0.0001905	7997.4	94070	4.63		Rhizobium	0.00096105	0.0093469	1018.8	69379	4.53		Pantoea	7.4508e-05	0.00073454	3968.3	0	-3.3
Gemella	2.0098e-05	0.00020098	46531	6797.8	-4.3		Azorhizobium	0.0010385	0.0093469	382.05	2572.3	3.04		Bartonella	7.5828e-05	0.00073454	99.206	22824	4.06
Fusobacterium	2.3511e-05	0.00021373	236430	31690	-5.01		Azospirillum	0.0020711	0.016946	18179	143210	4.8		Hyphomicrobium	7.6518e-05	0.00073454	23810	0	-4.08
Ochrobactrum	2.5853e-05	0.00021544	16286	136460	4.78		Stenotrophomonas	0.0025076	0.017444	4584.6	33729	4.16		Staphylococcus	7.8701e-05	0.00073454	375300	3776.7	-5.27
Escherichia	3.8134e-05	0.00029334	290.82	193240	4.98		Cylindrospermopsis	0.0025196	0.017444	31.838	760.81	2.56		Pseudoalteromonas	0.00012177	0.0010491	211310	14943	-4.99
Staphylococcus	9.6213e-05	0.00068724	7561.2	375980	5.27		Blastobacter	0.0037902	0.024366	26362	17209	-3.66		Escherichia	0.00047998	0.0036652	179960	985.22	-4.95
Porphyromonas	0.00015434	0.001029	88117	9297	-4.6		Aggregatibacter	0.0051977	0.030409	3884.2	5180.7	2.81		Microbacterium	0.00049088	0.0036652	127480	80296	-4.37
Hyphomicrobium	0.00016561	0.001035	145.41	28691	4.15		Veillonella	0.005406	0.030409	223910	59560	-4.91		Burkholderia	0.00076692	0.0053684	112900	398190	5.15
Microlunatus	0.00023131	0.0013607	4216.8	49984	4.36		Brevundimonas	0.007493	0.037726	28144	301640	5.14		Rhodopseudomonas	0.00093901	0.0061864	53472	0	-4.43
Propionibacterium	0.0003215	0.0017861	24865	294310	5.13		unclassified_(derived_from_Betaproteobacteria)	0.0075452	0.037726	11716	186980	4.94		Methylosinus	0.0011257	0.0070046	0	5090.3	3.41
Micrococcus	0.00040946	0.0021551	7415.8	71777	4.51		Bulleidia	0.019704	0.093333	28335	2825.9	-4.11		Geodermatophilus	0.0014942	0.0088078	4265.9	0	-3.33
Yersinia	0.00055581	0.0027597	145.41	3498.9	3.22		Enterobacter	0.022852	0.10284	95.513	3659.1	3.25		Leptospira	0.0025761	0.014426	21925	6732.3	-3.88
Pseudoalteromonas	0.00057954	0.0027597	22102	206030	4.96		unclassified_(derived_from_Bacteria)	0.029281	0.12549	2613600	3970000	5.83		unclassified_(derived_from_Betaproteobacteria)	0.0032341	0.017249	26190	181610	4.89
Psychrobacter	0.002054	0.0093365	0	2199.3	3.04		Pseudomonas	0.032409	0.13258	3194600	167600	-6.18		Kocuria	0.0037527	0.018731	16667	2298.9	-3.86
Campylobacter	0.0028678	0.012469	41005	9097.1	-4.2		Alcaligenes	0.040361	0.15794	95.513	2246.2	3.03		Propionibacterium	0.0038466	0.018731	299500	101970	-4.99
unclassified_(derived_from_Proteobacteria)	0.0033637	0.013408	1163.3	19094	3.95		Megasphaera	0.045438	0.17039	3342.9	289.83	-3.18		Ochrobactrum	0.0040801	0.019041	148810	1258100	5.74
Exiguobacterium	0.0033792	0.013408	0	3099	3.19		Haemophilus	0.048482	0.17199	12226	8405.1	-3.28		Neisseria	0.0045743	0.020493	694.44	92939	4.66
Kocuria	0.003486	0.013408	872.45	16295	3.89		Hespellia	0.049686	0.17199	9487.6	398.52	-3.66		Lactobacillus	0.0053408	0.023007	70139	2791.5	-4.53
Pantoea	0.0047209	0.017485	436.22	3898.8	3.24		Micrococcus	0.060153	0.19438	7227.1	48003	4.31		Helicobacter	0.0058254	0.024165	2182.5	0	-3.04
Ralstonia	0.005062	0.018079	3926	60281	4.45		Roseburia	0.060473	0.19438	33493	5832.9	-4.14		Fusobacterium	0.007809	0.031236	32540	101970	4.54
Marinomonas	0.005447	0.018229	0	1299.6	2.81		Gemella	0.066781	0.20725	44031	13296	-4.19		Rhizobium	0.0092758	0.035824	496.03	62233	4.49
Burkholderia	0.0055086	0.018229	0	108770	4.74		Erysipelothrix	0.080467	0.2384	19899	1775.2	-3.96		Bacillus	0.012214	0.04497	41964	22824	-3.98
Leptotrichia	0.0056511	0.018229	125340	91771	-4.22		Propionibacterium	0.08475	0.2384	25884	109770	4.62		Klebsiella	0.012447	0.04497	68948	656.81	-4.53
Listonella	0.0060763	0.018988	436.22	4098.7	3.26		Porphyromonas	0.085615	0.2384	92711	20940	-4.55		Atopobacter	0.013596	0.047266	2083.3	164.2	-2.98
Pectobacterium	0.0088696	0.026877	0	16795	3.92		Campylobacter	0.088709	0.2384	33429	12354	-4.02		Pectobacterium	0.013927	0.047266	12897	0	-3.81
Eubacterium	0.010018	0.029465	98005	27791	-4.55		Clostridium	0.091775	0.2384	39829	10144	-4.17		Azospirillum	0.018276	0.060204	27282	149590	4.79
Enterobacter	0.011009	0.031454	1308.7	6997.8	3.45		Neisseria	0.095041	0.2384	121210	103220	-3.95		Enterobacter	0.019145	0.061264	8432.5	7881.8	-2.44
Myroides	0.014216	0.039489	0	1499.5	2.88		unclassified_(derived_from_Epsilonproteobacteria)	0.09646	0.2384	4839.3	6811.1	2.99		Haemophilus	0.021051	0.062999	1488.1	5911.3	3.34
Tannerella	0.014762	0.039898	6398	17194	3.73		Eubacterium	0.098853	0.2384	98219	29744	-4.53		Myroides	0.021228	0.062999	1190.5	0	-2.78
Blastobacter	0.015201	0.040002	23992	9896.8	-3.85		Listonella	0.10299	0.2384	541.24	2101.3	2.89		Brevundimonas	0.021375	0.062999	37004	299510	5.12
Rhodopseudomonas	0.018788	0.047588	727.04	52383	4.41		Acinetobacter	0.10586	0.2384	286.54	7970.4	3.58		Shewanella	0.024701	0.070855	3075.4	328.41	-3.14
Bulleidia	0.019035	0.047588	28355	3199	-4.1		Prevotella	0.10595	0.2384	785430	319390	-5.37		Peptostreptococcus	0.025305	0.070855	41964	54351	3.79
Helicobacter	0.022716	0.055211	0	1399.6	2.85		Tannerella	0.10865	0.2385	4775.6	4021.4	-2.58		Leptotrichia	0.030615	0.083633	102080	230050	4.81
Geodermatophilus	0.023189	0.055211	581.63	4098.7	3.25		Vibrio	0.13599	0.2914	4138.9	3949	-1.98		unclassified_(derived_from_Gammaproteobacteria)	0.033965	0.090573	24206	6075.5	-3.96
Klebsiella	0.027727	0.064481	872.45	65079	4.51		Caulobacter	0.14659	0.30683	159.19	17861	3.95		Sebaldella	0.045036	0.11454	1190.5	8374.4	3.56
unclassified_(derived_from_Clostridiales)	0.02896	0.065819	91462	70877	-4.01		unclassified_(derived_from_Proteobacteria)	0.16073	0.32605	1209.8	2862.1	2.92		Cupriavidus	0.047558	0.11454	694.44	2955.7	3.05
Megasphaera	0.030228	0.067173	4071.4	1199.6	-3.16		Streptococcus	0.16303	0.32605	145120	57061	-4.64		Psychrobacter	0.04764	0.11454	2083.3	164.2	-2.98
Peptostreptococcus	0.032744	0.070128	32281	36488	3.32		unclassified_(derived_from_Rhodobacteraceae)	0.16804	0.32878	3056.4	797.04	-3.05		Desulfotomaculum	0.048677	0.11454	2480.2	164.2	-3.06
Ruminococcus	0.03296	0.070128	24138	39187	3.88		Hyphomonas	0.17785	0.33747	604.91	41953	4.32		unclassified_(derived_from_Vibrionaceae)	0.048716	0.11454	3571.4	164.2	-3.23
Sphingomonas	0.036015	0.075032	0	699.78	2.55		Ralstonia	0.18039	0.33747	3534	5579.3	3.01		Atopostipes	0.049091	0.11454	8928.6	0	-3.65
Oribacterium	0.03689	0.075286	214330	111860	-4.71		Fusobacterium	0.18373	0.33747	232100	98652	-4.82		Stenotrophomonas	0.061321	0.1398	29464	36125	3.52
Pannonibacter	0.049286	0.098573	872.45	1999.4	2.75		Flavobacterium	0.18987	0.34177	1082.5	27027	4.11		Porphyromonas	0.06241	0.1398	9623	18883	3.67
Veillonella	0.054495	0.1064	217240	181740	-4.25		Pseudoalteromonas	0.21873	0.386	21395	16158	-3.42		Candidatus_Solibacter	0.069705	0.15159	18948	32348	3.83
Roseburia	0.055329	0.1064	35625	43486	3.59		Ruminococcus	0.22368	0.38714	28144	7680.5	-4.01		Micrococcus	0.070382	0.15159	77480	52545	-4.1
Leptospira	0.066679	0.12581	5234.7	20194	3.87		Corynebacterium	0.27601	0.46869	171540	82675	-4.65		Pediococcus	0.07436	0.15714	3075.4	0	-3.19
Flavobacterium	0.06869	0.1272	1017.9	199.94	-2.61		Rothia	0.2925	0.4875	801730	633900	-4.92		Cronobacter	0.089321	0.18526	5754	492.61	-3.42
Actinomyces	0.071198	0.12945	164020	152050	-3.78		unclassified_(derived_from_Alphaproteobacteria)	0.30947	0.5064	145820	196720	4.41		Azorhizobium	0.09742	0.198	396.83	2955.7	3.11
unclassified_(derived_from_Betaproteobacteria)	0.07622	0.13611	11196	25992	3.87		unclassified_(derived_from_Clostridiales_Family_XI__Incertae_Sedis)	0.31832	0.51159	23050	14528	-3.63		Yersinia	0.098999	0.198	2678.6	492.61	-3.04
unclassified_(derived_from_Gammaproteobacteria)	0.080021	0.14039	4071.4	25592	4.03		Microbacterium	0.36557	0.57721	5285	10905	3.45		Exiguobacterium	0.10966	0.21547	3273.8	1642	-2.91
Cronobacter	0.084625	0.14591	5670.9	7197.7	2.88		Oribacterium	0.38	0.58966	203700	126000	-4.59		Raoultella	0.11284	0.2179	992.06	0	-2.7
unclassified_(derived_from_Propionibacteriaceae)	0.09469	0.16049	436.22	1699.5	2.8		Staphylococcus	0.38846	0.59257	8214.1	3151.9	-3.4		Cyanothece	0.12383	0.23139	1686.5	328.41	-2.83
Pseudomonas	0.10384	0.17307	3198800	461150	-6.14		Abiotrophia	0.40224	0.60336	26330	34562	3.61		Agrobacterium	0.12396	0.23139	56944	44335	-3.8
Phyllobacterium	0.10833	0.17759	1017.9	2599.2	2.9		Microlunatus	0.41143	0.60702	3788.7	3369.3	-2.32		Pseudomonas	0.13006	0.23869	449400	157960	-5.16
unclassified_(derived_from_Deltaproteobacteria)	0.12882	0.20636	145.41	1699.5	2.89		unclassified_(derived_from_Clostridiales)	0.42986	0.62013	90196	71480	-3.97		Agromyces	0.13213	0.23869	4960.3	2955.7	-3
Gordonia	0.13	0.20636	290.82	4798.5	3.35		Cupriavidus	0.43409	0.62013	13881	2572.3	-3.75		Ralstonia	0.13894	0.247	57143	10016	-4.37
Stenotrophomonas	0.13774	0.21522	3344.4	31090	4.14		Anaerococcus	0.4741	0.66671	18147	6303.8	-3.77		Brachybacterium	0.14173	0.24803	1884.9	2627.3	2.57
Streptococcus	0.15942	0.24526	141480	315100	4.94		Escherichia	0.51122	0.6924	477.56	1304.2	2.62		unclassified_(derived_from_Bacteria)	0.14978	0.25808	3044400	3903000	5.63
Rothia	0.19102	0.28943	796980	558020	-5.08		Granulicatella	0.5142	0.6924	30882	21230	-3.68		Aeromonas	0.1522	0.25828	1785.7	1313.6	-2.37
Erysipelothrix	0.1992	0.29731	17740	1699.5	-3.9		Agrobacterium	0.51546	0.6924	12194	42497	4.18		Oribacterium	0.16741	0.27985	107640	119050	3.76
Shewanella	0.21872	0.32164	3199	4498.6	2.81		Leptospira	0.5306	0.70226	4584.6	5579.3	2.7		Bradyrhizobium	0.18285	0.29846	8829.4	328.41	-3.63
Prevotella	0.23216	0.333	790290	560820	-5.06		Capnocytophaga	0.56631	0.71185	17606	6050.2	-3.76		Dietzia	0.18387	0.29846	8333.3	5911.3	-3.08
Peptoniphilus	0.2331	0.333	9887.7	8897.2	-2.7		Sebaldella	0.57491	0.71185	12035	9093.5	-3.17		Listonella	0.19784	0.31654	5853.2	2791.5	-3.19
unclassified_(derived_from_Clostridiales_Family_XI__Incertae_Sedis)	0.25303	0.35638	24283	10597	-3.84		Actinomyces	0.57554	0.71185	158140	153320	-3.38		Anaerococcus	0.2414	0.38079	10516	6239.7	-3.33
Bacillus	0.26162	0.36336	27773	43786	3.9		Mycobacterium	0.58065	0.71185	2578.8	543.43	-3.01		Gemella	0.24876	0.38696	6646.8	11494	3.38
Caulobacter	0.2984	0.40494	290.82	3898.8	3.26		Peptoniphilus	0.5922	0.71185	6654.1	6919.7	2.13		unclassified_(derived_from_Burkholderiales)	0.2784	0.42713	2182.5	328.41	-2.97
unclassified_(derived_from_Bacteria)	0.30599	0.40494	2623200	3062800	5.34		Peptostreptococcus	0.59282	0.71185	32665	45612	3.81		Finegoldia	0.28275	0.42795	6150.8	985.22	-3.41
Agromyces	0.30714	0.40494	581.63	2599.2	3		Atopobium	0.59321	0.71185	56607	48148	-3.63		Eubacterium	0.29393	0.43894	24901	26273	2.84
Atopobium	0.31252	0.40494	57145	50984	-3.49		Serratia	0.60363	0.71482	1719.2	941.95	-2.59		Clostridium	0.31847	0.46933	15774	7060.8	-3.64
Paracoccus	0.31299	0.40494	1454.1	11296	3.69		Mesoplasma	0.62012	0.72482	3947.9	3550.4	-2.3		Veillonella	0.32653	0.47496	168750	56650	-4.75
Raoultella	0.31585	0.40494	290.82	1299.6	2.7		Halothiobacillus	0.67261	0.77609	1687.4	3007	2.82		unclassified_(derived_from_Proteobacteria)	0.34806	0.49556	21726	7553.4	-3.85
Capnocytophaga	0.33086	0.41592	19194	35789	3.92		Selenomonas	0.68985	0.78591	1369	1485.4	1.77		Prevotella	0.35324	0.49556	548710	308050	-5.08
Dietzia	0.33274	0.41592	3344.4	6997.8	3.26		Pantoea	0.70491	0.79031	604.91	434.75	-1.93		Capnocytophaga	0.35397	0.49556	29167	2791.5	-4.12
Abiotrophia	0.37542	0.45747	28064	104270	4.58		Bacillus	0.71128	0.79031	26744	25034	-2.93		Actinomyces	0.3639	0.50317	150000	151720	2.94
Agrobacterium	0.37723	0.45747	11633	53983	4.33		unclassified_(derived_from_Gammaproteobacteria)	0.73598	0.80778	4234.4	5941.6	2.93		unclassified_(derived_from_Clostridiales)	0.37945	0.51245	69841	71757	2.98
Brevundimonas	0.3797	0.45747	24429	38688	3.85		Xanthomonas	0.77653	0.84202	318.38	181.14	-1.84		Paracoccus	0.38753	0.51245	10119	656.81	-3.68
Sebaldella	0.39636	0.47186	12360	899.71	-3.76		Cyanothece	0.82583	0.88481	159.19	507.21	2.24		unclassified_(derived_from_Clostridiales_Family_XI__Incertae_Sedis)	0.38873	0.51245	10119	12479	3.07
Achromobacter	0.42351	0.49825	6688.8	5498.2	-2.78		Achromobacter	0.83609	0.88527	6431.2	52278	4.36		unclassified_(derived_from_Propionibacteriaceae)	0.38891	0.51245	793.65	164.2	-2.5
Cellulosimicrobium	0.44335	0.51552	5525.5	1599.5	-3.29		Cellulosimicrobium	0.84727	0.88668	4966.7	3079.5	-2.98		Marinomonas	0.40419	0.51443	1091.3	328.41	-2.58
Atopobacter	0.46922	0.53933	1744.9	999.68	-2.57		Leptotrichia	0.85976	0.88731	129870	235450	4.72		Sphingomonas	0.40419	0.51443	992.06	328.41	-2.52
Finegoldia	0.48223	0.54799	2471.9	4998.4	3.1		Butyrivibrio	0.87283	0.88731	16587	20977	3.34		unclassified_(derived_from_Deltaproteobacteria)	0.4042	0.51443	1388.9	328.41	-2.73
unclassified_(derived_from_Epsilonproteobacteria)	0.53992	0.60665	5525.5	499.84	-3.4		Finegoldia	0.87745	0.88731	2165	1666.5	-2.4		Peptoniphilus	0.46888	0.59005	8928.6	5582.9	-3.22
Granulicatella	0.56675	0.62972	28645	40187	3.76		Paracoccus	0.91562	0.91562	1528.2	760.81	-2.59		unclassified_(derived_from_Alphaproteobacteria)	0.4962	0.6175	307340	194250	-4.75
Azospirillum	0.58912	0.64739	18176	27691	3.68									Campylobacter	0.50979	0.62399	10516	15928	3.43
Brucella	0.60927	0.65513	581.63	10297	3.69									Rothia	0.51257	0.62399	541670	632350	4.66
Aeromonas	0.60927	0.65513	581.63	999.68	2.32									Cellulosimicrobium	0.5266	0.63352	2182.5	5911.3	3.27
Shuttleworthia	0.7664	0.81532	581.63	1699.5	2.75									Methylobacterium	0.5317	0.63352	31250	55993	4.09
Butyrivibrio	0.81349	0.85631	15995	18294	3.06									Gordonia	0.54032	0.63701	3174.6	1806.2	-2.84
unclassified_(derived_from_Alphaproteobacteria)	0.85412	0.88555	140170	301000	4.91									Achromobacter	0.5771	0.67328	6746	57471	4.4
Clostridium	0.85898	0.88555	30536	14995	-3.89									Granulicatella	0.58439	0.67329	38194	21511	-3.92
Cyanothece	0.87397	0.89044	727.04	1099.6	2.27									Selenomonas	0.58913	0.67329	6051.6	2298.9	-3.27
Selenomonas	0.88153	0.89044	2471.9	3498.9	2.71									Abiotrophia	0.669	0.75685	94841	39737	-4.44
Anaerococcus	0.90397	0.90397	8869.9	11296	3.08									Caulobacter	0.72772	0.81504	4265.9	14286	3.7
														Ruminococcus	0.73677	0.81701	39087	2955.7	-4.26
														Rhodococcus	0.78463	0.86156	1488.1	985.22	-2.4
														Blastobacter	0.80187	0.87193	12401	18719	3.5
														Streptococcus	0.81952	0.88256	313690	54351	-5.11
														Atopobium	0.88466	0.94364	50298	44663	-3.45
														Pannonibacter	0.89964	0.94703	2083.3	821.02	-2.8
														unclassified_(derived_from_Epsilonproteobacteria)	0.90998	0.94703	1388.9	6568.1	3.41
														Erysipelothrix	0.91741	0.94703	1785.7	1970.4	1.97
														Bulleidia	0.93494	0.94703	3769.8	2298.9	-2.87
														Tannerella	0.93545	0.94703	17163	3119.9	-3.85
														Roseburia	0.94025	0.94703	42262	7389.2	-4.24
														Butyrivibrio	0.94703	0.94703	23115	21018	-3.02

## Sheet: Table S5
Table S5: Common and unique genera (abundance >0.1%) in each sample group. The relative abundance of each genus was calculated using STAMP.
30 common elements in "Control", "Demise" and "Recovered"	6 elements included exclusively in "Control"	25 elements included exclusively in "Demise"	13 elements included exclusively in "Recovered"	6 common elements in "Control" and "Demise"	8 common elements in "Demise" and "Recovered"	7 common elements in "Control" and "Recovered"
Pseudomonas	Arthrospira	Enterococcus	Brucella	Cupriavidus	Acinetobacter	Sphingobacterium
unclassified (derived from Bacteria)	Leuconostoc	Escherichia	Achromobacter	Roseburia	Burkholderia	Neisseria
Prevotella	Shewanella	Lactobacillus	Zoogloea	Ruminococcus	Micrococcus	Porphyromonas
Rothia	Moraxella	Vibrio	Flavobacterium	Anaerococcus	Methylobacterium	Gemella
Fusobacterium	Bulleidia	Serratia	Bartonella	Staphylococcus	Rhizobium	Blastobacter
Streptococcus	Acidithiobacillus	Klebsiella	Hyphomonas	Capnocytophaga	Stenotrophomonas	unclassified (derived from Clostridiales Family XI. Incertae Sedis)
Oribacterium		Rhodopseudomonas	Methylobacillus		unclassified (derived from Betaproteobacteria)	Haemophilus
Veillonella		Rahnella	Phyllobacterium		Candidatus Solibacter
Corynebacterium		Microlunatus	Caulobacter
Actinomyces		Dialister	Arthrobacter
unclassified (derived from Alphaproteobacteria)		unclassified (derived from Gammaproteobacteria)	Leeuwenhoekiella
Leptotrichia		Bacteroides	Asticcacaulis
unclassified (derived from Clostridiales)		Hyphomicrobium	Aminobacter
Eubacterium		Sphingobium
Atopobium		Shigella
Clostridium		Enterobacter
Brevundimonas		unclassified (derived from Proteobacteria)
Campylobacter		Leptospira
Peptostreptococcus		Paracoccus
Bacillus		Delftia
Granulicatella		Bradyrhizobium
Propionibacterium		Pectobacterium
Abiotrophia		Geobacillus
Pseudoalteromonas		Kocuria
Ralstonia		Cronobacter
Ochrobactrum
Butyrivibrio
Azospirillum
Microbacterium
Agrobacterium

## Sheet: Table S6
Table S6: Common and unique species (abundance >0.1%) in each sample group. The relative abundance of each genus was calculated using STAMP.
36 common elements in "Control", "Demise" and "Recovered"	22 elements included exclusively in "Control"	55 elements included exclusively in "Demise"	33 elements included exclusively in "Recovered"	13 common elements in "Demise" and "Recovered"	12 common elements in "Control" and "Recovered"	6 common elements in "Control" and "Demise"
uncultured bacterium	Cupriavidus gilardii	Acinetobacter septicus	Brucella abortus	uncultured marine bacterium	Neisseria flavescens	Pseudomonas aeruginosa
uncultured Pseudomonas sp.	Sphingobacterium multivorum	Staphylococcus epidermidis	Azospirillum sp. TSH51	Burkholderia cepacia	Porphyromonas catoniae	Roseburia intestinalis
Rothia mucilaginosa	Arthrospira platensis	Streptococcus pneumoniae	Achromobacter denitrificans	Pseudoalteromonas sp. UST020129-030	Fusobacterium nucleatum	Pseudomonas pseudoalcaligenes
Prevotella melaninogenica	Streptococcus dysgalactiae	Enterococcus faecium	Burkholderia cenocepacia	Ochrobactrum tritici	Sphingobacterium thalpophilum	Pseudomonas stutzeri
Oribacterium sinus	Pseudomonas citronellolis	Escherichia coli	Ochrobactrum sp. R-24448	Micrococcus luteus	Prevotella histicola	Brevundimonas intermedia
candidate division TM7 single-cell isolate TM7a	Pseudomonas sp. BSFD5	Enterococcus durans	Microbacterium schleiferi	Ochrobactrum anthropi	Neisseria subflava	Pseudoalteromonas haloplanktis
Pseudomonas putida	Leuconostoc citreum	Acinetobacter calcoaceticus	Burkholderia stabilis	Stenotrophomonas maltophilia	Blastobacter aggregatus
Fusobacterium periodonticum	Pseudomonas nitroreducens	Corynebacterium propinquum	Rhizobium giardinii	Methylobacterium lusitanum	Streptococcus mitis
Pseudomonas mendocina	Streptococcus salivarius	Enterococcus faecalis	uncultured Rhizobium sp.	uncultured beta proteobacterium	rumen bacterium NK4A66
uncultured alpha proteobacterium	Pseudomonas fluorescens	Enterococcus casseliflavus	Ochrobactrum sp. R-24286	Candidatus Solibacter usitatus	Parvimonas micra
Actinomyces odontolyticus	Gemella sanguinis	Corynebacterium testudinoris	Zoogloea ramigera	Micrococcus sp. TS17	Leptotrichia goodfellowii
Prevotella sp. 8400706	Pseudomonas tolaasii	Klebsiella pneumoniae	Rhizobium yanglingense	Leptotrichia trevisanii	Brevundimonas diminuta
butyrate-producing bacterium SM4/1	Campylobacter concisus	Streptococcus pseudopneumoniae	Ochrobactrum sp. R-24653	Prevotella oris
Eubacterium saburreum	Neisseria animalis	Microbacterium oxydans	Pseudomonas oryzihabitans
Prevotella salivae	Bulleidia extructa	Lactobacillus mucosae	uncultured Achromobacter sp.
Veillonella dispar	Ralstonia sp. PHS1	Rhodopseudomonas palustris	Hyphomonas neptunium
Corynebacterium accolens	Leptotrichia hofstadii	Ralstonia pickettii	Achromobacter xylosoxidans
Veillonella atypica	Gemella haemolysans	Bacillus firmus	Methylobacterium radiotolerans
Corynebacterium macginleyi	Moraxella bovoculi	Microbacterium phyllosphaerae	Flavobacterium columnare
Veillonella parvula	Acidithiobacillus thiooxidans	Serratia liquefaciens	Burkholderia sp. 383
Leptotrichia wadei	uncultured Streptococcus sp.	uncultured soil bacterium	Methylobacillus flagellatus
Leptotrichia shahii	Clostridium sphenoides	Rahnella aquatilis	Caulobacter vibrioides
Peptostreptococcus anaerobius		Microlunatus phosphovorus	Phyllobacterium myrsinacearum
Atopobium vaginae		Dialister pneumosintes	Bartonella sp.
Granulicatella adiacens		Pseudomonas plecoglossicida	Burkholderia anthina
Bacillus subtilis		Rhizobium etli	Flavobacterium sp.
Atopobium parvulum		Pseudoalteromonas sp. BSw10014	Leeuwenhoekiella marinoflava
Rothia dentocariosa		Enterococcus hirae	Leptotrichia sp. HKU24
Butyrivibrio fibrisolvens		Ruminococcus gnavus	Asticcacaulis biprosthecium
Propionibacterium acnes		Capnocytophaga sputigena	Corynebacterium lipophiloflavum
Corynebacterium xerosis		Ruminococcus lactaris	Propionibacterium granulosum
Azospirillum sp. BV-s		Pseudoalteromonas tetraodonis	Bartonella henselae
Prevotella veroralis		Pseudoalteromonas sp. KMM 701	Sphingobacterium sp. PM2-P1-29
Agrobacterium tumefaciens		Hyphomicrobium facile
Abiotrophia para-adiacens		Lactobacillus fermentum
Abiotrophia defectiva		Vibrio furnissii
		Sphingobium yanoikuyae
		uncultured gamma proteobacterium
		Vibrio coralliilyticus
		Prevotella denticola
		Corynebacterium ureicelerivorans
		Serratia marcescens
		Serratia proteamaculans
		Corynebacterium freneyi
		Shigella dysenteriae
		Enterococcus ratti
		Ochrobactrum intermedium
		Delftia tsuruhatensis
		Corynebacterium mucifaciens
		Pectobacterium carotovorum
		Prevotella oulorum
		Lactobacillus gasseri
		Corynebacterium amycolatum
		Microbacterium flavescens
		Vibrio diazotrophicus

## Sheet: Table S7
Table S7: Biomarker genera in the three groups i.e. control, demised, and recovered. Analysis was performed in the Microbiome Analyst with p-value cutoff 0.05 and Log LDA score cutoff 4.0 and Kruskal-Wallis rank sum test.
Genus	Pvalues	FDR	Control	Demised	Recovered	LDAscore
Pseudomonas	0.0081734	0.02209	3178300	462250	96631	6.19
unclassified_(derived_from_Bacteria)	0.074378	0.13523	2632800	3067300	4024800	5.84
Ochrobactrum	6.47e-08	1.69e-06	16286	140160	1249300	5.79
Corynebacterium	3.3e-06	3.97e-05	183800	742060	91502	5.51
Brucella	3.66e-08	1.69e-06	436.22	10197	462470	5.36
Prevotella	0.1952	0.29134	767320	542530	315210	5.35
Acinetobacter	7.38e-07	1.05e-05	3053.6	406470	9596.9	5.3
Burkholderia	8.35e-06	5.96e-05	145.41	109760	386520	5.29
Staphylococcus	1.14e-05	7.13e-05	10469	374680	2482	5.27
Propionibacterium	0.002691	0.0084094	23992	291510	98286	5.13
Brevundimonas	0.0080586	0.02209	24429	38888	292870	5.13
Streptococcus	0.21364	0.30249	144970	317000	59402	5.11
Rothia	0.34238	0.42269	791460	549520	613710	5.08
unclassified_(derived_from_Betaproteobacteria)	0.016845	0.041642	11923	23892	220730	5.02
Fusobacterium	0.00025384	0.0012088	230910	32190	95804	5
Pseudoalteromonas	0.00052685	0.0021074	21084	210130	23000	4.98
Escherichia	3.57e-06	3.97e-05	436.22	180640	827.32	4.95
unclassified_(derived_from_Alphaproteobacteria)	0.38142	0.45407	141630	302500	195250	4.91
Veillonella	0.012465	0.031961	220730	164850	61718	4.9
Leptotrichia	0.046854	0.095619	125050	102370	227350	4.8
Microbacterium	6.5e-06	5.42e-05	12796	132960	87365	4.78
Neisseria	1.78e-07	3.55e-06	120690	7597.6	104740	4.75
Oribacterium	0.075897	0.13553	212150	108470	122440	4.71
Serratia	6.74e-08	1.69e-06	1890.3	85573	1489.2	4.62
Porphyromonas	0.0029552	0.0089553	89862	9097.1	20352	4.61
Vibrio	2.7e-07	4.51e-06	6979.6	82873	7611.4	4.58
Eubacterium	0.043827	0.091307	97860	28991	31935	4.54
Klebsiella	0.00012537	0.00069648	581.63	65779	165.46	4.52
Rhizobium	0.0010109	0.0033695	1017.9	799.74	67013	4.52
Abiotrophia	0.50395	0.55379	27191	93770	34086	4.52
Micrococcus	0.024884	0.05787	7270.4	70577	54769	4.5
Lactobacillus	0.0020646	0.00666	3635.2	64179	2316.5	4.49
Achromobacter	0.74418	0.76719	6398	5798.1	64035	4.46
Ruminococcus	0.30519	0.39635	30972	63580	7942.3	4.44
Rhodopseudomonas	0.00013907	0.00073192	145.41	52083	0	4.42
Methylobacterium	0.0008617	0.0030775	1744.9	30790	53776	4.42
Ralstonia	0.017073	0.041642	3635.2	55182	10424	4.41
Microlunatus	5.75e-05	0.00033816	4653.1	50284	2978.4	4.37
Agrobacterium	0.32571	0.41229	11778	57682	48977	4.36
Gemella	0.00083484	0.0030775	46821	6697.9	11748	4.3
Stenotrophomonas	0.00049474	0.0020614	3053.6	30090	39711	4.26
Candidatus_Solibacter	0.00098446	0.0033695	0	18094	33093	4.22
Hyphomicrobium	4.49e-06	4.34e-05	145.41	30790	0	4.19
Campylobacter	0.029685	0.067467	38679	8497.3	19690	4.18
Clostridium	0.6095	0.6484	41878	14395	11583	4.18
Roseburia	0.16933	0.26457	34753	37688	7942.3	4.17
Capnocytophaga	0.38879	0.45741	18321	33089	6122.2	4.13
Bulleidia	0.0090192	0.023735	28209	4798.5	3143.8	4.1
unclassified_(derived_from_Clostridiales)	0.060153	0.11795	95097	70477	76279	4.09
Phyllobacterium	3.79e-08	1.69e-06	2035.7	2499.2	25978	4.08
Peptostreptococcus	0.062582	0.12035	28209	33589	49308	4.02
unclassified_(derived_from_Gammaproteobacteria)	0.2092	0.30249	4362.2	25092	5460.3	4.02
Granulicatella	0.75879	0.77428	30536	39987	21510	3.97
unclassified_(derived_from_Proteobacteria)	0.042105	0.089585	1163.3	19594	6453.1	3.96
Pectobacterium	0.031515	0.070033	436.22	16895	0	3.93
Erysipelothrix	0.069666	0.12901	18031	1899.4	1654.6	3.91
Caulobacter	0.10839	0.18687	290.82	3498.9	16381	3.91
Haemophilus	7.11e-06	5.47e-05	15559	1199.6	9927.9	3.86
Kocuria	0.00045239	0.0019669	1163.3	15395	1985.6	3.85
Tannerella	0.30995	0.39737	6107.1	17494	3805.7	3.84
Sebaldella	0.12978	0.20932	13378	599.81	8273.2	3.81
Bacillus	0.26257	0.35419	27191	39987	32431	3.81
Azospirillum	0.78009	0.78797	18031	28091	15885	3.79
Blastobacter	0.067155	0.12671	22684	10797	16712	3.77
Atopobium	0.4049	0.4706	62525	51783	50798	3.77
Paracoccus	0.3716	0.44772	2471.9	11496	165.46	3.75
unclassified_(derived_from_Clostridiales_Family_XI__Incertae_Sedis)	0.59961	0.64474	22247	11196	14064	3.74
Anaerococcus	0.70785	0.73734	16867	10797	6784	3.7
Hespellia	0.40942	0.4706	9596.9	3199	992.79	3.63
Enterobacter	0.0062071	0.018256	872.45	5998.1	8604.1	3.59
Aminobacter	4.78e-06	4.34e-05	145.41	299.9	6453.1	3.5
unclassified_(derived_from_Epsilonproteobacteria)	0.12363	0.20268	4362.2	599.81	6784	3.49
Leptospira	0.21779	0.30249	5380.1	11596	6618.6	3.49
Methylosinus	0.00079303	0.0030501	436.22	299.9	6287.6	3.48
Actinomyces	0.36261	0.44221	155880	152550	158510	3.47
Pantoea	9.5e-06	6.33e-05	290.82	5698.2	165.46	3.44
Cronobacter	0.17681	0.27202	5380.1	6098	661.86	3.43
Dietzia	0.47348	0.532	2181.1	7497.6	5791.3	3.42
Butyrivibrio	0.83136	0.83136	17304	20294	22503	3.42
Listonella	0.019471	0.046358	145.41	4198.7	2151	3.31
Finegoldia	0.19383	0.29134	2908.2	5198.3	1654.6	3.25
Cellulosimicrobium	0.70299	0.73734	5525.5	1999.4	2316.5	3.25
Geodermatophilus	0.00017314	0.00086568	0	3498.9	330.93	3.24
Agromyces	0.12328	0.20268	872.45	4298.6	1985.6	3.23
Gordonia	0.33696	0.4212	436.22	3598.8	1985.6	3.2
Desulfotomaculum	0.0080951	0.02209	0	3099	330.93	3.19
Megasphaera	0.2916	0.38368	3199	1799.4	165.46	3.18
Peptoniphilus	0.5894	0.64065	7125	9696.9	9100.5	3.11
Alcaligenes	0.2167	0.30249	581.63	699.78	2647.4	3.01
Psychrobacter	0.00041058	0.0018663	0	1999.4	0	3
Yersinia	0.033099	0.071955	0	1499.5	330.93	2.88
unclassified_(derived_from_Deltaproteobacteria)	0.10274	0.18024	0	1499.5	496.39	2.88
Azorhizobium	0.26564	0.35419	581.63	499.84	1985.6	2.87
Aeromonas	0.058944	0.11789	145.41	1599.5	661.86	2.86
Pannonibacter	0.11442	0.19394	436.22	1599.5	165.46	2.86
Shewanella	0.13531	0.21479	1308.7	1399.6	165.46	2.79
Cyanothece	0.20756	0.30249	290.82	1199.6	661.86	2.66
Atopobacter	0.2613	0.35419	1744.9	1699.5	827.32	2.66
Selenomonas	0.49989	0.55379	1454.1	2099.3	1323.7	2.59
Rhodococcus	0.46209	0.5251	727.04	1199.6	661.86	2.43

## Sheet: Table S8
Table S8: Biomarker species in the three groups i.e. control, demised, and recovered. Analysis was performed in the Microbiome Analyst with p-value cutoff 0.05 and Log LDA score cutoff 4.0 and Kruskal-Wallis rank sum test.
Species	Pvalues	FDR	Control	Demised	Recovered	LDAscore
Phyllobacterium myrsinacearum	2.0788e-10	5.3216e-08	436.22	1099.6	23992	4.07
Ochrobactrum anthropi	1.9945e-08	2.5529e-06	6979.6	31990	802670	5.6
Brucella abortus	3.6645e-08	3.127e-06	436.22	10197	462470	5.36
Corynebacterium testudinoris	7.4659e-08	4.3841e-06	4507.6	72477	6453.1	4.53
Pseudomonas nitroreducens	8.5626e-08	4.3841e-06	29227	4698.5	165.46	4.16
Serratia liquefaciens	9.232e-07	3.939e-05	145.41	49884	496.39	4.4
Haemophilus parainfluenzae	3.0648e-06	9.8552e-05	11051	499.84	7445.9	3.72
Neisseria flavescens	3.4969e-06	9.8552e-05	87099	0	18201	4.64
Escherichia coli	3.5747e-06	9.8552e-05	436.22	180640	827.32	4.95
Corynebacterium freneyi	4.4573e-06	9.8552e-05	290.82	20593	827.32	4.01
Hyphomicrobium facile	4.4904e-06	9.8552e-05	145.41	30790	0	4.19
Aminobacter aminovorans	4.7775e-06	9.8552e-05	145.41	299.9	6453.1	3.5
Burkholderia cepacia	5.0046e-06	9.8552e-05	0	109270	384210	5.28
Ochrobactrum tritici	5.7719e-06	0.00010554	3926	87272	439470	5.34
Pantoea agglomerans	9.5007e-06	0.00016214	290.82	5698.2	165.46	3.44
Bacillus licheniformis	2.8647e-05	0.00045227	145.41	8397.3	0	3.62
Corynebacterium xerosis	3.0034e-05	0.00045227	13814	173940	16546	4.9
Vibrio coralliilyticus	3.2279e-05	0.00045909	2326.5	19294	5956.7	3.93
Fusobacterium periodonticum	4.8864e-05	0.00065795	155590	20294	57913	4.83
Staphylococcus epidermidis	5.1402e-05	0.00065795	10469	352490	2316.5	5.24
Microlunatus phosphovorus	5.7488e-05	0.0007008	4653.1	50284	2978.4	4.37
Acinetobacter calcoaceticus	6.1389e-05	0.00071435	145.41	133560	0	4.82
Gemella haemolysans	7.2281e-05	0.00080452	22102	4198.7	3143.8	3.98
Klebsiella pneumoniae	0.00012537	0.0013372	581.63	65779	165.46	4.52
Rhodopseudomonas palustris	0.00013907	0.001424	145.41	52083	0	4.42
Methylobacterium lusitanum	0.00016254	0.0016004	727.04	30090	22172	4.17
Geodermatophilus obscurus	0.00017314	0.0016416	0	3498.9	330.93	3.24
Pseudoalteromonas haloplanktis	0.00019301	0.0017647	12941	68478	1985.6	4.52
Vibrio furnissii	0.00022327	0.001971	2181.1	24792	827.32	4.08
Microbacterium phyllosphaerae	0.00026752	0.0022365	3199	48884	3805.7	4.36
Pseudomonas aeruginosa	0.00027083	0.0022365	1814800	52883	992.79	5.96
Acinetobacter septicus	0.00031598	0.0025278	145.41	255120	0	5.11
Pseudomonas citronellolis	0.00034489	0.0026755	39551	1399.6	165.46	4.29
Stenotrophomonas maltophilia	0.00038227	0.0028783	727.04	28991	38222	4.27
Psychrobacter glacincola	0.00041058	0.0030031	0	1999.4	0	3
candidate division TM7 single cell isolate TM7a	0.00056706	0.0040324	235270	125060	294200	4.93
Brevundimonas diminuta	0.00060572	0.0041241	12214	9796.9	286420	5.14
Gemella sanguinis	0.00061218	0.0041241	22684	2399.2	7280.4	4.01
Acinetobacter baumannii	0.00065653	0.0043095	872.45	7497.6	827.32	3.52
Serratia proteamaculans	0.00078176	0.0049516	145.41	17494	0	3.94
Methylosinus sp LW3	0.00079303	0.0049516	436.22	299.9	6287.6	3.48
Campylobacter concisus	0.00088824	0.005414	26900	1799.4	7280.4	4.1
Candidatus Solibacter usitatus	0.00098446	0.005861	0	18094	33093	4.22
Rhizobium yanglingense	0.0010109	0.0058813	1017.9	799.74	67013	4.52
Kocuria rosea	0.0012954	0.0071997	727.04	7897.5	1654.6	3.55
Neisseria subflava	0.0013064	0.0071997	29518	799.74	82732	4.61
Microbacterium oxydans	0.0013218	0.0071997	2471.9	56082	8273.2	4.43
Staphylococcus hominis	0.0016009	0.0085379	0	22193	165.46	4.05
uncultured marine bacterium	0.0018557	0.0096953	436.22	110660	20518	4.74
Bacillus psychrodurans	0.0020355	0.010363	0	4098.7	661.86	3.31
Lactobacillus fermentum	0.0020646	0.010363	3635.2	64179	2316.5	4.49
Propionibacterium acnes	0.002115	0.010412	15413	280310	84883	5.12
Prevotella nanceiensis	0.0024363	0.011768	11051	8697.2	2978.4	3.61
Pseudoalteromonas sp UST020129 030	0.0028419	0.013473	7270.4	105270	15554	4.69
Porphyromonas catoniae	0.0031027	0.014442	86227	8697.2	18697	4.59
Serratia marcescens	0.0032573	0.014891	1599.5	18194	992.79	3.93
Vibrio harveyi	0.0034125	0.015327	290.82	13396	330.93	3.82
Leptotrichia shahii	0.003497	0.015414	45367	29790	78926	4.39
Clostridium xylanolyticum	0.0035525	0.015414	10179	0	3640.2	3.71
Microbacterium flavescens	0.0037622	0.016052	1890.3	13296	496.39	3.81
Clostridium glycolicum	0.0038804	0.016285	5816.3	399.87	1158.3	3.43
Corynebacterium amycolatum	0.004069	0.016801	1017.9	11996	1158.3	3.74
Pseudomonas balearica	0.0051009	0.020727	4216.8	6198	165.46	3.48
uncultured proteobacterium	0.0056007	0.022403	0	10697	3474.8	3.73
Corynebacterium ureicelerivorans	0.0065988	0.025989	436.22	18894	5791.3	3.97
Vibrio shilonii	0.0074045	0.028721	145.41	2199.3	0	3.04
Gemella morbillorum	0.0075465	0.028835	2035.7	99.968	1323.7	2.99
Desulfotomaculum thermocisternum	0.0080951	0.030476	0	3099	330.93	3.19
Bulleidia extructa	0.0090192	0.033462	28209	4798.5	3143.8	4.1
Prevotella marshii	0.0097534	0.03567	3199	299.9	330.93	3.16
Pseudomonas mendocina	0.010641	0.038368	137410	31090	19194	4.77
Veillonella parvula	0.012265	0.043607	53946	52383	19690	4.23
Methylobacterium radiotolerans	0.012548	0.044002	1017.9	699.78	31604	4.19
Acinetobacter sp	0.01323	0.045767	145.41	2899.1	330.93	3.14
Vibrio vulnificus	0.014266	0.048695	1163.3	8897.2	165.46	3.64
Corynebacterium coyleae	0.014493	0.048819	145.41	11696	1985.6	3.76
Streptococcus equi	0.01577	0.052429	727.04	9097.1	2812.9	3.62
Microbacterium dextranolyticum	0.016106	0.05286	3635.2	6597.9	1323.7	3.42
uncultured beta proteobacterium	0.016845	0.054585	11923	23892	220730	5.02
Vibrio nereis	0.017257	0.055029	0	699.78	0	2.55
Streptococcus australis	0.017412	0.055029	8869.9	399.87	1323.7	3.63
Veillonella caviae	0.0182	0.056818	2762.8	2099.3	0	3.14
Actinomyces naeslundii	0.01935	0.058968	5670.9	899.71	827.32	3.38
Listonella anguillarum	0.019471	0.058968	145.41	4198.7	2151	3.31
Porphyromonas gingivalis	0.019689	0.058968	3635.2	399.87	1654.6	3.21
Vibrio diazotrophicus	0.019809	0.058968	872.45	13596	330.93	3.82
Veillonella dispar	0.020573	0.060537	85791	80874	15554	4.55
Eubacterium saburreum	0.021314	0.062005	96115	27391	26474	4.54
Ralstonia pickettii	0.021931	0.063082	3489.8	53383	6122.2	4.4
Streptococcus infantis	0.02269	0.064405	11778	1499.5	3143.8	3.71
Veillonella atypica	0.022894	0.064405	78230	29491	26474	4.41
uncultured soil bacterium	0.023318	0.064885	6543.4	61080	13899	4.44
Microbacterium laevaniformans	0.024325	0.066959	290.82	2599.2	827.32	3.06
Leptotrichia buccalis	0.026859	0.073148	2762.8	499.84	11748	3.75
Ochrobactrum intermedium	0.027451	0.073972	5234.7	16095	6122.2	3.73
Haemophilus haemolyticus	0.031502	0.082571	4507.6	699.78	2482	3.28
Pectobacterium carotovorum	0.031515	0.082571	436.22	16895	0	3.93
Pseudomonas plecoglossicida	0.031609	0.082571	9160.7	35889	1985.6	4.23
Enterobacter amnigenus	0.032123	0.083067	872.45	4798.5	4467.5	3.29
Agromyces sp KY5R	0.032736	0.083805	436.22	2199.3	0	3.04
Yersinia sp MH 1	0.033099	0.083895	0	1499.5	330.93	2.88
Corynebacterium riegelii	0.033565	0.084241	145.41	4898.4	827.32	3.38
Campylobacter lanienae	0.035016	0.087031	727.04	0	165.46	2.56
Prevotella pallens	0.037652	0.092682	3926	3798.8	0	3.29
Pseudomonas pseudoalcaligenes	0.040219	0.098057	22974	49584	2647.4	4.37
Pseudomonas fluorescens	0.041131	0.099336	25156	11696	2482	4.05
Pseudomonas alcaligenes	0.04398	0.10522	1599.5	299.9	330.93	2.81
Streptococcus mitis	0.044638	0.10581	30681	9397	14230	4.03
Microbacterium schleiferi	0.046061	0.10818	436.22	4298.6	72142	4.55
Micrococcus luteus	0.047311	0.11011	5961.7	51983	31273	4.36
butyrate producing bacterium SS3 4	0.048562	0.1113	5380.1	6897.8	1985.6	3.39
Pseudoalteromonas arctica	0.048692	0.1113	145.41	4798.5	3640.2	3.37
Prevotella loescheii	0.049924	0.1131	8142.8	899.71	1489.2	3.56
Oribacterium sinus	0.051795	0.11631	208220	104070	118470	4.72
Kocuria rhizophila	0.052386	0.11631	436.22	7497.6	330.93	3.55
Micrococcus sp SMCC ZAT351	0.052888	0.11631	145.41	1599.5	3805.7	3.26
Enterobacter cloacae	0.053411	0.11631	0	1199.6	4136.6	3.32
uncultured Pseudomonas sp	0.05361	0.11631	891930	133460	14892	5.64
Corynebacterium sp 3301750	0.056426	0.12139	145.41	7797.5	1158.3	3.58
butyrate producing bacterium SM4 1	0.057889	0.12338	89717	63580	74293	4.12
Aeromonas salmonicida	0.058944	0.12338	145.41	1599.5	661.86	2.86
Streptococcus parasanguinis	0.059121	0.12338	12505	11296	2316.5	3.71
Streptococcus sanguinis	0.059278	0.12338	2035.7	99.968	5129.4	3.4
Peptostreptococcus anaerobius	0.062582	0.1292	28209	33589	49308	4.02
Fusobacterium nucleatum	0.064265	0.13161	75321	11896	37891	4.5
Pseudoalteromonas sp 'A4 isolate 1'	0.064996	0.13206	290.82	999.68	0	2.7
Burkholderia gladioli	0.065617	0.13227	145.41	499.84	2316.5	3.04
Corynebacterium propinquum	0.066906	0.13273	12796	94970	0	4.68
Blastobacter aggregatus	0.067155	0.13273	22684	10797	16712	3.77
Streptococcus salivarius	0.067404	0.13273	33880	1499.5	7611.4	4.21
Leptotrichia wadei	0.06807	0.13302	47403	45885	61387	3.89
Micrococcus sp TS17	0.069628	0.13409	1163.3	16995	19690	3.97
Erysipelothrix rhusiopathiae	0.069666	0.13409	18031	1899.4	1654.6	3.91
Pseudomonas stutzeri	0.072605	0.13871	16286	30290	4302.1	4.11
Streptococcus vestibularis	0.074192	0.14069	5961.7	2399.2	3309.3	3.25
Brevundimonas intermedia	0.086802	0.16339	11633	25692	5625.8	4
Corynebacterium sp 1146	0.098562	0.18417	581.63	9796.9	9100.5	3.66
uncultured delta proteobacterium	0.10274	0.19059	0	1499.5	496.39	2.88
Ochrobactrum pseudogrignonense	0.10485	0.1931	145.41	4798.5	992.79	3.37
Caulobacter vibrioides	0.10839	0.19781	290.82	3498.9	16381	3.91
Prevotella nigrescens	0.10895	0.19781	1454.1	199.94	827.32	2.8
Prevotella melaninogenica	0.1098	0.19796	474030	298300	191610	5.15
Pannonibacter phragmitetus	0.11442	0.20427	436.22	1599.5	165.46	2.86
Abiotrophia defectiva	0.1149	0.20427	13523	59181	16712	4.36
uncultured bacterium	0.11764	0.2077	2363000	2766900	3678900	5.82
Pseudomonas graminis	0.12104	0.21224	581.63	99.968	0	2.47
uncultured epsilon proteobacterium	0.12363	0.21531	4362.2	599.81	6784	3.49
Sebaldella termitidis	0.12978	0.22448	13378	599.81	8273.2	3.81
Granulicatella elegans	0.13157	0.22605	3053.6	599.81	2647.4	3.09
Shewanella frigidimarina	0.13531	0.23094	1308.7	1399.6	165.46	2.79
Actinomyces meyeri	0.15107	0.25599	5816.3	1299.6	9100.5	3.59
rumen bacterium NK4A66	0.15199	0.25599	26464	1299.6	13072	4.1
Pseudomonas putida	0.15456	0.25862	176530	88372	36071	4.85
Roseburia intestinalis	0.16933	0.28148	34753	37688	7942.3	4.17
Capnocytophaga sputigena	0.17457	0.28833	11342	27291	2812.9	4.09
Cronobacter sakazakii	0.17681	0.28876	5380.1	6098	661.86	3.43
Prevotella salivae	0.17709	0.28876	82156	110660	33258	4.59
Corynebacterium sp	0.18387	0.29791	6107.1	14495	1985.6	3.8
Finegoldia magna	0.19383	0.31208	2908.2	5198.3	1654.6	3.25
Corynebacterium flavescens	0.19787	0.3166	436.22	999.68	0	2.7
Prevotella shahii	0.20312	0.32297	6688.8	4898.4	1820.1	3.39
Cyanothece sp PCC 7425	0.20756	0.32385	290.82	1199.6	661.86	2.66
uncultured gamma proteobacterium	0.2092	0.32385	4362.2	25092	5460.3	4.02
Capnocytophaga gingivalis	0.20963	0.32385	3926	4098.7	496.39	3.26
Leptotrichia hofstadii	0.20994	0.32385	16722	2599.2	7611.4	3.85
Propionibacterium acidipropionici	0.21	0.32385	2326.5	4298.6	496.39	3.28
Alcaligenes faecalis	0.2167	0.33188	581.63	699.78	2647.4	3.01
Leptospira interrogans	0.21779	0.33188	5380.1	11596	6618.6	3.49
Capnocytophaga ochracea	0.22457	0.34018	3053.6	1699.5	2812.9	2.83
Agromyces mediolanus	0.23172	0.34895	436.22	2099.3	1985.6	2.92
Rothia mucilaginosa	0.23727	0.35353	773720	499040	396950	5.28
Neisseria mucosa	0.23753	0.35353	4071.4	6797.8	3805.7	3.18
Prevotella buccae	0.24597	0.36398	3344.4	4898.4	165.46	3.37
Atopobacter phocae	0.2613	0.38445	1744.9	1699.5	827.32	2.66
Azorhizobium caulinodans	0.26564	0.38549	581.63	499.84	1985.6	2.87
Prevotella sp 8400706	0.26601	0.38549	117050	42686	37395	4.6
Prevotella oris	0.26653	0.38549	12650	15095	12244	3.15
Peptoniphilus harei	0.27862	0.40071	3926	5298.3	3309.3	3
Ruminococcus flavefaciens	0.2803	0.40087	8724.5	3498.9	5294.9	3.42
Campylobacter showae	0.2857	0.40632	7852	5398.3	8935.1	3.25
uncultured Ralstonia sp	0.28762	0.4068	145.41	1799.4	4302.1	3.32
Megasphaera micronuciformis	0.2916	0.41016	3199	1799.4	165.46	3.18
Streptococcus pneumoniae	0.29718	0.41573	290.82	256620	4302.1	5.11
Stenotrophomonas acidaminiphila	0.30343	0.42216	2326.5	1099.6	1489.2	2.79
Tannerella forsythia	0.30995	0.4289	6107.1	17494	3805.7	3.84
Atopobium parvulum	0.31281	0.43054	31263	24592	25151	3.52
Streptococcus gordonii	0.32079	0.43916	2762.8	999.68	661.86	3.02
Acinetobacter lwoffii	0.3251	0.43989	436.22	5198.3	1323.7	3.38
Agrobacterium tumefaciens	0.32571	0.43989	11778	57682	48977	4.36
Oribacterium sp oral taxon 078	0.32753	0.43989	3926	4398.6	3971.1	2.38
Corynebacterium mucifaciens	0.3282	0.43989	1308.7	12996	9762.4	3.77
Gordonia polyisoprenivorans	0.33696	0.44928	436.22	3598.8	1985.6	3.2
candidate division TM7 genomosp GTL1	0.34167	0.4532	1017.9	2299.3	4136.6	3.19
Actinomyces odontolyticus	0.356	0.46977	143370	147750	147430	3.34
Anaerococcus tetradius	0.36494	0.4791	7561.2	1099.6	330.93	3.56
Paracoccus marcusii	0.3716	0.48536	2471.9	11496	165.46	3.75
Ruminococcus torques	0.37415	0.4862	10324	6797.8	661.86	3.68
uncultured alpha proteobacterium	0.38142	0.49315	141630	302500	195250	4.91
Prevotella copri	0.38477	0.49499	1599.5	299.9	330.93	2.81
Prevotella baroniae	0.39013	0.49937	581.63	1899.4	165.46	2.94
Pseudoalteromonas tetraodonis	0.39456	0.50253	436.22	30590	1820.1	4.18
Hespellia stercorisuis	0.40942	0.51887	9596.9	3199	992.79	3.63
Ruminococcus lactaris	0.41358	0.51955	6979.6	28091	1489.2	4.12
Pseudomonas monteilii	0.41401	0.51955	3635.2	5498.2	10093	3.51
uncultured Streptococcus sp	0.43574	0.54415	28209	12096	5460.3	4.06
Prevotella maculosa	0.44499	0.553	1599.5	1299.6	661.86	2.67
Rhodococcus erythropolis	0.46209	0.57147	727.04	1199.6	661.86	2.43
Dietzia maris	0.47348	0.58101	2181.1	7497.6	5791.3	3.42
Anaerococcus lactolyticus	0.47434	0.58101	3344.4	2699.1	4798.5	3.02
Leptotrichia goodfellowii	0.47671	0.58113	9596.9	3298.9	10590	3.56
Acinetobacter sp JB10	0.49427	0.59969	145.41	1599.5	5956.7	3.46
Selenomonas ruminantium	0.49989	0.60364	1454.1	2099.3	1323.7	2.59
Pseudomonas gingeri	0.51327	0.61689	1454.1	9097.1	1489.2	3.58
Streptococcus anginosus	0.52054	0.6227	727.04	3099	2978.4	3.07
Brevundimonas vesicularis	0.5282	0.62893	581.63	3398.9	827.32	3.15
Prevotella oulorum	0.54923	0.65094	727.04	11996	1985.6	3.75
Streptococcus oralis	0.55364	0.65116	5380.1	2899.1	2978.4	3.09
Microbacterium imperiale	0.5545	0.65116	872.45	1199.6	496.39	2.55
Prevotella denticola	0.56217	0.65465	12069	19194	5294.9	3.84
Pseudomonas sp KBOS 03	0.56259	0.65465	2471.9	799.74	992.79	2.92
Propionibacterium granulosum	0.56738	0.65569	6252.5	6897.8	12906	3.52
Corynebacterium matruchotii	0.5686	0.65569	727.04	5998.1	3309.3	3.42
Pseudomonas gessardii	0.58624	0.67299	1308.7	899.71	661.86	2.51
Parvimonas micra	0.59961	0.68527	22247	11196	14064	3.74
Atopobium vaginae	0.60722	0.69047	29372	24592	23992	3.43
Corynebacterium kutscheri	0.60956	0.69047	5961.7	2899.1	3309.3	3.19
Granulicatella adiacens	0.62255	0.70209	27482	39387	18863	4.01
Phyllobacterium bourgognense	0.66323	0.74467	1599.5	1399.6	1985.6	2.47
Ruminococcus gnavus	0.68838	0.76954	4943.9	25192	496.39	4.09
Prevotella falsenii	0.69455	0.77307	436.22	4198.7	330.93	3.29
Cellulosimicrobium cellulans	0.70299	0.77907	5525.5	1999.4	2316.5	3.25
Clostridium sordellii	0.70707	0.78022	9887.7	8097.4	992.79	3.65
Anaerococcus prevotii	0.71426	0.78476	5961.7	6997.8	1654.6	3.43
Campylobacter gracilis	0.71771	0.78519	3199	1299.6	3309.3	3
Corynebacterium macginleyi	0.73905	0.8051	62380	15895	13072	4.39
uncultured Achromobacter sp	0.74418	0.80654	6398	5798.1	64035	4.46
Streptococcus cristatus	0.74668	0.80654	1163.3	5598.2	3143.8	3.35
Leptotrichia trevisanii	0.75599	0.81316	1744.9	15295	42193	4.31
Azospirillum sp BV s	0.78009	0.83558	18031	28091	15885	3.79
Corynebacterium accolens	0.79581	0.84887	71686	249020	15554	5.07
Eubacterium hallii	0.81095	0.86094	1744.9	1599.5	5460.3	3.29
Clostridium sphenoides	0.81487	0.86094	13232	3798.8	2812.9	3.72
Peptoniphilus asaccharolyticus	0.81722	0.86094	1599.5	2699.1	4798.5	3.2
Actinomyces gerencseriae	0.82666	0.86516	1017.9	2599.2	1158.3	2.9
Rothia dentocariosa	0.8303	0.86516	17740	50484	216760	5
Butyrivibrio fibrisolvens	0.83136	0.86516	17304	20294	22503	3.42
Peptoniphilus indolicus	0.87234	0.90412	1599.5	1699.5	992.79	2.55
Clostridium bartlettii	0.87703	0.90532	2762.8	2099.3	2978.4	2.64
unidentified proteobacterium	0.88868	0.91366	1163.3	8897.2	2978.4	3.59
Acinetobacter junii	0.89818	0.91973	1163.3	599.81	1158.3	2.45
Prevotella veroralis	0.90955	0.92767	26610	13196	24323	3.83
Bacillus subtilis	0.92495	0.93963	27046	27491	31769	3.37
Leptotrichia sp HKU24	0.93127	0.94001	1454.1	4998.4	14892	3.83
Corynebacterium tuberculostearicum	0.93266	0.94001	1308.7	12696	661.86	3.78
Abiotrophia para adiacens	0.95111	0.95484	13668	34589	17374	4.02
Atopobium rimae	0.98389	0.98389	1890.3	2599.2	1654.6	2.68
